# Supplementary material for: Computational design of valence tautomeric adducts of CoIIdiketonates with redox-active o-benzoquinone ligands
Source: Royal Society of Chemistry journal article supplement (doi:10.1039/c2dt31567j), 2012-10-31
Supplement: c2dt31567j.pdf [file c2dt31567j.pdf]

## Supplementary Information

### Computational Design of Valence Tautomeric Adducts of Co<sup>II</sup> Diketonates with Redox-Active *o*-Benzoquinone Ligands†

Vladimir I. Minkin\*, Alyona A. Starikova, and Ruslan M. Minyaev

### Absolute energies and optimized geometries at B3LYP\*/6-311++G(d,p)

#### 6 X=Y=O, BQ

E=-381.32057 a.u.

|   |              |              |             |
|---|--------------|--------------|-------------|
| 8 | 2.216387000  | 0.070998000  | 0.000000000 |
| 8 | 0.401067000  | 2.180678000  | 0.000000000 |
| 6 | 0.000000000  | 1.035048000  | 0.000000000 |
| 6 | -1.431749000 | 0.686131000  | 0.000000000 |
| 6 | -1.823525000 | -0.604328000 | 0.000000000 |
| 6 | -0.869961000 | -1.712612000 | 0.000000000 |
| 6 | 0.464495000  | -1.518080000 | 0.000000000 |
| 6 | 1.023862000  | -0.154530000 | 0.000000000 |
| 1 | -2.138280000 | 1.510826000  | 0.000000000 |
| 1 | -2.882150000 | -0.851119000 | 0.000000000 |
| 1 | -1.271835000 | -2.722564000 | 0.000000000 |
| 1 | 1.173903000  | -2.340325000 | 0.000000000 |

#### 6 X=Y=O, SQ

E=-381.40166 a.u.

|   |              |              |             |
|---|--------------|--------------|-------------|
| 8 | 2.242101000  | 0.095903000  | 0.000000000 |
| 8 | 0.366381000  | 2.213987000  | 0.000000000 |
| 6 | 0.000000000  | 1.014200000  | 0.000000000 |
| 6 | -1.399410000 | 0.642205000  | 0.000000000 |
| 6 | -1.827327000 | -0.668995000 | 0.000000000 |
| 6 | -0.885185000 | -1.733032000 | 0.000000000 |
| 6 | 0.468172000  | -1.466747000 | 0.000000000 |
| 6 | 1.006787000  | -0.122731000 | 0.000000000 |
| 1 | -2.112451000 | 1.465460000  | 0.000000000 |
| 1 | -2.892792000 | -0.896600000 | 0.000000000 |
| 1 | -1.239909000 | -2.763122000 | 0.000000000 |
| 1 | 1.199078000  | -2.274256000 | 0.000000000 |

#### 6 X=O,Y=NH, BQ

E=-361.44311 a.u.

|   |              |              |              |
|---|--------------|--------------|--------------|
| 7 | 1.879967000  | 1.234839000  | 0.000111000  |
| 8 | 1.618547000  | -1.526848000 | -0.000079000 |
| 6 | 0.622338000  | -0.828660000 | -0.000046000 |
| 6 | -0.734672000 | -1.405205000 | 0.000041000  |
| 6 | -1.832531000 | -0.620379000 | 0.000027000  |
| 6 | -1.741739000 | 0.833705000  | -0.000051000 |
| 6 | -0.549078000 | 1.462914000  | -0.000053000 |
| 6 | 0.710457000  | 0.709807000  | -0.000006000 |
| 1 | -0.796050000 | -2.489073000 | 0.000235000  |
| 1 | 1.812229000  | 2.259476000  | 0.000106000  |
| 1 | -2.822653000 | -1.069243000 | 0.000189000  |
| 1 | -2.664189000 | 1.407452000  | 0.000006000  |

|                      |              |              |              |
|----------------------|--------------|--------------|--------------|
| 1                    | -0.486131000 | 2.549204000  | -0.000163000 |
| <b>6 X=O,Y=NH SQ</b> |              |              |              |
| E=-361.50894 a.u.    |              |              |              |
| 7                    | 0.422939000  | 2.244359000  | 0.000000000  |
| 8                    | 2.250631000  | 0.091188000  | 0.000000000  |
| 6                    | 1.015557000  | -0.126266000 | 0.000000000  |
| 6                    | 0.480415000  | -1.470448000 | 0.000000000  |
| 6                    | -0.872559000 | -1.753408000 | 0.000000000  |
| 6                    | -1.823290000 | -0.701828000 | 0.000000000  |
| 6                    | -1.392177000 | 0.610216000  | 0.000000000  |
| 6                    | 0.000000000  | 0.987437000  | 0.000000000  |
| 1                    | 1.218130000  | -2.271133000 | 0.000000000  |
| 1                    | -0.405798000 | 2.852830000  | 0.000000000  |
| 1                    | -1.213727000 | -2.788247000 | 0.000000000  |
| 1                    | -2.888161000 | -0.928900000 | 0.000000000  |
| 1                    | -2.123739000 | 1.421214000  | 0.000000000  |

**6 X=Y=NH, BQ**

E=-341.56193 a.u.

|   |              |              |              |
|---|--------------|--------------|--------------|
| 7 | -1.388304000 | 0.084683000  | -1.778645000 |
| 7 | 1.388304000  | -0.084683000 | -1.778645000 |
| 6 | 0.751482000  | -0.113012000 | -0.664327000 |
| 6 | 1.388304000  | -0.318975000 | 0.643938000  |
| 6 | 0.706478000  | -0.171993000 | 1.798682000  |
| 6 | -0.706478000 | 0.171993000  | 1.798682000  |
| 6 | -1.388304000 | 0.318975000  | 0.643938000  |
| 6 | -0.751482000 | 0.113012000  | -0.664327000 |
| 1 | 2.448672000  | -0.561505000 | 0.646922000  |
| 1 | -2.385802000 | 0.263405000  | -1.619051000 |
| 1 | 1.209689000  | -0.301496000 | 2.752883000  |
| 1 | -1.209689000 | 0.301496000  | 2.752883000  |
| 1 | -2.448672000 | 0.561505000  | 0.646922000  |
| 1 | 2.385802000  | -0.263405000 | -1.619051000 |

**6 X=Y=NH, SQ**

E=-341.61344 a.u.

|   |              |              |              |
|---|--------------|--------------|--------------|
| 7 | 1.807228000  | 1.410653000  | -0.000454000 |
| 7 | 1.807229000  | -1.410651000 | 0.000456000  |
| 6 | 0.660816000  | -0.749569000 | -0.000005000 |
| 6 | -0.632250000 | -1.392759000 | -0.000366000 |
| 6 | -1.833263000 | -0.708163000 | -0.000293000 |
| 6 | -1.833264000 | 0.708162000  | 0.000295000  |
| 6 | -0.632250000 | 1.392758000  | 0.000365000  |
| 6 | 0.660812000  | 0.749569000  | -0.000004000 |
| 1 | -0.633000000 | -2.484150000 | -0.000665000 |
| 1 | 1.585745000  | 2.413925000  | -0.000623000 |

|   |              |              |              |
|---|--------------|--------------|--------------|
| 1 | -2.775149000 | -1.254763000 | -0.000047000 |
| 1 | -2.775151000 | 1.254761000  | 0.000055000  |
| 1 | -0.633003000 | 2.484149000  | 0.000666000  |
| 1 | 1.585750000  | -2.413924000 | 0.000644000  |

### **bis(malonate) Co<sup>II</sup>**

E=-1915.67069736 a.u.

|    |              |              |              |
|----|--------------|--------------|--------------|
| 6  | 0.002214000  | 0.000122000  | 3.215734000  |
| 6  | 0.000941000  | -1.240524000 | 2.564685000  |
| 6  | 0.003201000  | 1.240855000  | 2.564854000  |
| 1  | 0.002685000  | 0.000053000  | 4.300355000  |
| 1  | 0.001111000  | -2.140094000 | 3.196243000  |
| 1  | 0.004041000  | 2.140329000  | 3.196526000  |
| 6  | 1.241490000  | 0.000887000  | -2.567928000 |
| 6  | -1.239910000 | 0.002250000  | -2.567103000 |
| 6  | 0.000595000  | 0.002161000  | -3.218486000 |
| 1  | 2.140806000  | 0.001201000  | -3.199815000 |
| 1  | -2.139634000 | 0.002532000  | -3.198438000 |
| 1  | 0.000228000  | 0.001893000  | -4.303091000 |
| 8  | -1.452400000 | 0.001070000  | -1.312622000 |
| 8  | 1.454854000  | -0.000095000 | -1.313542000 |
| 8  | 0.002231000  | 1.453879000  | 1.310440000  |
| 8  | -0.000205000 | -1.453391000 | 1.310240000  |
| 27 | 0.001756000  | 0.000350000  | -0.001357000 |

### **bis(acetylacetonate) Co<sup>II</sup>**

E=-2072.89123363 a.u.

|    |              |              |              |
|----|--------------|--------------|--------------|
| 27 | 0.000000000  | 0.000000000  | 0.000281000  |
| 8  | 1.320543000  | 1.017598000  | -1.017942000 |
| 8  | 1.320543000  | -1.017717000 | 1.018383000  |
| 6  | 2.585594000  | -0.886587000 | 0.886424000  |
| 6  | 2.585594000  | 0.885976000  | -0.886480000 |
| 6  | 3.225977000  | -0.000500000 | -0.000221000 |
| 1  | 4.309318000  | -0.000814000 | -0.000532000 |
| 6  | 3.418755000  | -1.778282000 | 1.777152000  |
| 1  | 3.162951000  | -1.581204000 | 2.823795000  |
| 1  | 4.491162000  | -1.632367000 | 1.633654000  |
| 1  | 3.165501000  | -2.824858000 | 1.576231000  |
| 6  | 3.418759000  | 1.777180000  | -1.777693000 |
| 1  | 3.162105000  | 1.580438000  | -2.824189000 |
| 1  | 4.491163000  | 1.630516000  | -1.634932000 |
| 1  | 3.166371000  | 2.823903000  | -1.576439000 |
| 8  | -1.320543000 | 1.017717000  | 1.018383000  |
| 6  | -2.585594000 | 0.886587000  | 0.886424000  |
| 6  | -3.225977000 | 0.000500000  | -0.000221000 |
| 6  | -2.585594000 | -0.885976000 | -0.886480000 |

|   |              |              |              |
|---|--------------|--------------|--------------|
| 8 | -1.320543000 | -1.017598000 | -1.017942000 |
| 6 | -3.418759000 | -1.777180000 | -1.777693000 |
| 1 | -3.166371000 | -2.823903000 | -1.576439000 |
| 1 | -4.491163000 | -1.630516000 | -1.634932000 |
| 1 | -3.162105000 | -1.580438000 | -2.824189000 |
| 1 | -4.309318000 | 0.000814000  | -0.000532000 |
| 6 | -3.418755000 | 1.778282000  | 1.777152000  |
| 1 | -4.491162000 | 1.632367000  | 1.633654000  |
| 1 | -3.162951000 | 1.581204000  | 2.823795000  |
| 1 | -3.165501000 | 2.824858000  | 1.576231000  |

**bis(hexafluoroacetylacetonate) Co<sup>II</sup>**

E=-3263.63635 a.u.

|    |              |              |              |
|----|--------------|--------------|--------------|
| 27 | 0.000000000  | 0.001337000  | 0.000296000  |
| 8  | -1.335838000 | -1.002032000 | -1.013125000 |
| 8  | -1.334490000 | 1.004020000  | 1.016228000  |
| 8  | 1.336187000  | -1.013089000 | 1.002188000  |
| 8  | 1.334190000  | 1.016122000  | -1.003881000 |
| 6  | -2.585675000 | -0.861401000 | -0.869576000 |
| 6  | -3.259809000 | 0.000546000  | 0.003255000  |
| 6  | -2.584491000 | 0.862767000  | 0.874915000  |
| 6  | 2.585967000  | -0.871063000 | 0.859652000  |
| 6  | 3.259851000  | 0.000748000  | -0.003530000 |
| 6  | 2.584236000  | 0.873086000  | -0.864821000 |
| 1  | -4.339818000 | 0.000559000  | 0.004003000  |
| 1  | 4.339857000  | 0.000632000  | -0.004753000 |
| 6  | 3.407877000  | 1.802455000  | -1.784720000 |
| 9  | 3.116019000  | 3.089436000  | -1.523779000 |
| 9  | 4.736283000  | 1.638184000  | -1.624726000 |
| 9  | 3.113382000  | 1.557697000  | -3.074228000 |
| 6  | 3.411442000  | -1.802759000 | 1.775526000  |
| 9  | 4.739443000  | -1.627136000 | 1.624428000  |
| 9  | 3.108056000  | -1.573138000 | 3.065550000  |
| 9  | 3.130670000  | -3.089398000 | 1.500122000  |
| 6  | -3.408449000 | 1.780396000  | 1.806247000  |
| 9  | -3.118391000 | 1.514679000  | 3.092725000  |
| 9  | -3.112496000 | 3.070416000  | 1.566372000  |
| 9  | -4.736797000 | 1.622107000  | 1.639845000  |
| 6  | -3.410863000 | -1.781391000 | -1.797454000 |
| 9  | -3.110376000 | -1.531393000 | -3.084469000 |
| 9  | -3.126830000 | -3.071376000 | -1.542280000 |
| 9  | -4.738947000 | -1.610940000 | -1.641278000 |

7

E= -2297.00361 a.u.

|    |             |              |              |
|----|-------------|--------------|--------------|
| 27 | 0.639002000 | -0.000081000 | -0.000598000 |
|----|-------------|--------------|--------------|

|   |              |              |              |
|---|--------------|--------------|--------------|
| 8 | 0.635517000  | 1.676948000  | 1.134848000  |
| 8 | 2.003260000  | 0.880787000  | -1.192547000 |
| 8 | 2.003899000  | -0.879143000 | 1.192170000  |
| 8 | 0.637322000  | -1.677235000 | -1.135434000 |
| 6 | 1.456063000  | 2.638461000  | 1.071267000  |
| 6 | 2.458809000  | 2.823096000  | 0.111394000  |
| 6 | 2.649512000  | 1.943846000  | -0.961714000 |
| 6 | 2.650180000  | -1.942431000 | 0.962570000  |
| 6 | 2.459940000  | -2.822622000 | -0.109883000 |
| 6 | 1.457859000  | -2.638709000 | -1.070550000 |
| 1 | 3.086603000  | 3.704585000  | 0.178834000  |
| 1 | 3.087725000  | -3.704202000 | -0.176224000 |
| 1 | 3.431238000  | -2.197213000 | 1.695884000  |
| 1 | 1.352282000  | -3.413370000 | -1.846223000 |
| 1 | 3.430930000  | 2.199199000  | -1.694443000 |
| 1 | 1.349984000  | 3.412545000  | 1.847458000  |
| 8 | -0.997996000 | 0.640047000  | -1.139783000 |
| 8 | -0.997621000 | -0.641044000 | 1.139042000  |
| 6 | -2.118154000 | -0.377669000 | 0.650744000  |
| 6 | -3.377465000 | -0.738914000 | 1.244411000  |
| 6 | -4.532472000 | -0.369305000 | 0.621666000  |
| 6 | -4.532675000 | 0.368926000  | -0.620880000 |
| 6 | -3.377865000 | 0.738308000  | -1.244135000 |
| 6 | -2.118377000 | 0.376760000  | -0.651060000 |
| 1 | -3.368471000 | -1.290154000 | 2.178960000  |
| 1 | -5.490502000 | -0.629848000 | 1.062292000  |
| 1 | -5.490844000 | 0.629695000  | -1.061066000 |
| 1 | -3.369180000 | 1.289588000  | -2.178664000 |

## 8

E=-2297.02749 a.u.

|    |             |              |              |
|----|-------------|--------------|--------------|
| 27 | 0.623771000 | -0.000048000 | -0.000028000 |
| 8  | 0.539856000 | 1.459684000  | 1.226657000  |
| 8  | 1.968452000 | 0.747397000  | -1.112303000 |
| 8  | 1.968469000 | -0.746394000 | 1.113012000  |
| 8  | 0.541754000 | -1.459849000 | -1.226729000 |
| 6  | 1.260683000 | 2.495207000  | 1.120044000  |
| 6  | 2.209300000 | 2.774126000  | 0.132292000  |
| 6  | 2.489146000 | 1.885606000  | -0.906866000 |
| 6  | 2.490763000 | -1.883841000 | 0.907427000  |
| 6  | 2.212577000 | -2.772372000 | -0.132162000 |
| 6  | 1.263870000 | -2.494470000 | -1.120116000 |
| 1  | 2.745701000 | 3.714367000  | 0.174219000  |
| 1  | 2.750215000 | -3.711904000 | -0.174155000 |
| 1  | 3.246180000 | -2.176566000 | 1.648242000  |
| 1  | 1.104642000 | -3.244292000 | -1.906356000 |

|   |              |              |              |
|---|--------------|--------------|--------------|
| 1 | 3.244575000  | 2.179039000  | -1.647387000 |
| 1 | 1.100315000  | 3.244961000  | 1.906117000  |
| 8 | -0.780236000 | -0.829632000 | 1.007565000  |
| 8 | -0.780453000 | 0.828407000  | -1.008204000 |
| 6 | -1.934434000 | 0.462446000  | -0.564738000 |
| 6 | -3.168990000 | 0.907765000  | -1.105188000 |
| 6 | -4.343430000 | 0.451994000  | -0.551393000 |
| 6 | -4.343309000 | -0.453409000 | 0.551390000  |
| 6 | -3.168749000 | -0.909108000 | 1.104982000  |
| 6 | -1.934306000 | -0.463680000 | 0.564350000  |
| 1 | -3.153501000 | 1.595019000  | -1.944685000 |
| 1 | -5.294261000 | 0.784793000  | -0.956926000 |
| 1 | -5.294052000 | -0.786252000 | 0.957095000  |
| 1 | -3.153072000 | -1.596360000 | 1.944478000  |

**9**

E=-2454.22355 a.u.

|    |              |              |              |
|----|--------------|--------------|--------------|
| 27 | 0.205580000  | 0.000056000  | 0.000208000  |
| 8  | 0.221407000  | 1.816305000  | 0.857718000  |
| 8  | 1.553881000  | 0.707595000  | -1.299059000 |
| 8  | 1.551862000  | -0.707929000 | 1.301450000  |
| 8  | 0.222802000  | -1.815717000 | -0.858493000 |
| 6  | 1.024326000  | 2.784632000  | 0.669141000  |
| 6  | 2.017481000  | 2.820139000  | -0.325321000 |
| 6  | 2.217217000  | 1.791585000  | -1.263114000 |
| 6  | 2.216517000  | -1.791084000 | 1.264613000  |
| 6  | 2.019128000  | -2.818542000 | 0.325116000  |
| 6  | 1.026878000  | -2.783153000 | -0.670266000 |
| 1  | 2.640024000  | 3.703908000  | -0.395552000 |
| 1  | 2.642748000  | -3.701594000 | 0.394856000  |
| 8  | -1.419240000 | 0.464159000  | -1.221384000 |
| 8  | -1.419289000 | -0.465245000 | 1.221109000  |
| 6  | -2.544516000 | -0.277153000 | 0.695209000  |
| 6  | -3.800786000 | -0.548512000 | 1.333967000  |
| 6  | -4.960638000 | -0.275325000 | 0.665663000  |
| 6  | -4.960616000 | 0.272896000  | -0.666610000 |
| 6  | -3.800742000 | 0.546478000  | -1.334711000 |
| 6  | -2.544489000 | 0.275618000  | -0.695705000 |
| 1  | -3.791043000 | -0.956798000 | 2.339395000  |
| 1  | -5.917102000 | -0.470456000 | 1.142209000  |
| 1  | -5.917064000 | 0.467689000  | -1.143324000 |
| 1  | -3.790957000 | 0.954766000  | -2.340138000 |
| 6  | 0.853654000  | -3.964603000 | -1.598636000 |
| 1  | -0.169174000 | -4.346147000 | -1.509797000 |
| 1  | 0.984349000  | -3.629378000 | -2.633084000 |
| 1  | 1.559503000  | -4.770754000 | -1.387225000 |

|   |              |              |              |
|---|--------------|--------------|--------------|
| 6 | 3.273333000  | -1.945187000 | 2.335703000  |
| 1 | 3.816348000  | -2.889240000 | 2.254165000  |
| 1 | 3.980756000  | -1.111877000 | 2.267091000  |
| 1 | 2.797789000  | -1.884291000 | 3.320457000  |
| 6 | 3.275093000  | 1.945308000  | -2.333190000 |
| 1 | 3.982876000  | 1.112440000  | -2.263085000 |
| 1 | 2.800637000  | 1.883293000  | -3.318405000 |
| 1 | 3.817505000  | 2.889735000  | -2.251932000 |
| 6 | 0.848645000  | 3.966910000  | 1.595984000  |
| 1 | 1.553487000  | 4.773830000  | 1.384141000  |
| 1 | -0.174671000 | 4.346847000  | 1.505902000  |
| 1 | 0.979047000  | 3.633120000  | 2.630934000  |

## 10

E=-2454.24826 a.u.

|    |              |               |              |
|----|--------------|---------------|--------------|
| 27 | 7.772574000  | -9.476508000  | 1.270509000  |
| 8  | 7.717633000  | -7.584070000  | 1.448604000  |
| 8  | 9.646425000  | -9.625155000  | 1.468486000  |
| 8  | 7.558851000  | -9.587882000  | 3.145882000  |
| 8  | 7.727679000  | -11.353116000 | 0.968257000  |
| 6  | 8.736553000  | -6.846604000  | 1.641865000  |
| 6  | 10.062457000 | -7.295383000  | 1.740076000  |
| 6  | 10.438850000 | -8.641652000  | 1.643017000  |
| 6  | 7.437638000  | -10.675582000 | 3.800026000  |
| 6  | 7.459283000  | -11.965440000 | 3.252953000  |
| 6  | 7.602611000  | -12.229699000 | 1.882186000  |
| 1  | 10.840002000 | -6.558575000  | 1.896141000  |
| 1  | 7.351982000  | -12.806514000 | 3.925987000  |
| 8  | 5.871281000  | -9.432703000  | 0.980492000  |
| 8  | 7.918587000  | -9.244357000  | -0.633270000 |
| 6  | 6.751331000  | -9.166653000  | -1.171775000 |
| 6  | 6.530450000  | -8.988616000  | -2.563334000 |
| 6  | 5.238891000  | -8.914647000  | -3.033276000 |
| 6  | 4.121585000  | -9.012370000  | -2.152000000 |
| 6  | 4.290790000  | -9.186997000  | -0.797300000 |
| 6  | 5.606677000  | -9.268601000  | -0.269099000 |
| 1  | 7.390001000  | -8.916629000  | -3.221853000 |
| 1  | 5.059389000  | -8.778624000  | -4.095718000 |
| 1  | 3.119389000  | -8.947393000  | -2.565431000 |
| 1  | 3.450349000  | -9.261899000  | -0.114871000 |
| 6  | 7.613931000  | -13.656790000 | 1.386563000  |
| 1  | 8.560285000  | -13.850567000 | 0.870954000  |
| 1  | 7.489080000  | -14.375939000 | 2.198318000  |
| 1  | 6.811448000  | -13.791618000 | 0.654040000  |
| 6  | 7.254292000  | -10.488840000 | 5.287973000  |
| 1  | 6.347718000  | -9.901162000  | 5.466594000  |



|   |              |               |             |
|---|--------------|---------------|-------------|
| 1 | 7.177725000  | -11.441258000 | 5.815826000 |
| 1 | 8.096815000  | -9.916182000  | 5.689132000 |
| 6 | 11.895835000 | -9.028538000  | 1.742283000 |
| 1 | 12.024983000 | -9.753613000  | 2.552365000 |
| 1 | 12.199761000 | -9.521997000  | 0.813094000 |
| 1 | 12.540175000 | -8.165525000  | 1.920412000 |
| 6 | 8.427864000  | -5.372984000  | 1.766939000 |
| 1 | 7.904697000  | -5.034996000  | 0.866551000 |
| 1 | 7.750362000  | -5.218774000  | 2.613282000 |
| 1 | 9.328865000  | -4.773445000  | 1.910187000 |

## 11

E=-3644.98270 a.u.

|    |              |              |              |
|----|--------------|--------------|--------------|
| 27 | 0.001514000  | 0.521254000  | -0.000063000 |
| 8  | 0.321325000  | 2.198746000  | -1.275364000 |
| 8  | -0.304903000 | 2.201893000  | 1.274607000  |
| 8  | -1.934954000 | 0.548587000  | -0.625794000 |
| 8  | -0.553309000 | -0.859799000 | 1.376490000  |
| 8  | 0.545802000  | -0.865447000 | -1.375239000 |
| 8  | 1.938557000  | 0.534906000  | 0.624798000  |
| 6  | -0.177140000 | 3.309075000  | 0.740162000  |
| 6  | -0.356334000 | 4.577778000  | 1.410406000  |
| 6  | -0.162751000 | 5.718875000  | 0.703459000  |
| 6  | 0.211699000  | 5.716987000  | -0.705036000 |
| 6  | 0.394664000  | 4.573976000  | -1.411713000 |
| 6  | 0.203770000  | 3.307165000  | -0.741146000 |
| 6  | -2.840258000 | -0.267895000 | -0.312385000 |
| 6  | -2.783899000 | -1.292396000 | 0.639041000  |
| 6  | -1.639590000 | -1.491223000 | 1.423042000  |
| 6  | 1.627560000  | -1.504544000 | -1.422029000 |
| 6  | 2.773872000  | -1.312917000 | -0.639161000 |
| 6  | 2.837952000  | -0.288102000 | 0.311435000  |
| 1  | -0.632225000 | 4.573642000  | 2.459553000  |
| 1  | -3.651339000 | -1.914662000 | 0.799791000  |
| 1  | 3.636915000  | -1.941220000 | -0.800081000 |
| 1  | -0.286193000 | 6.682065000  | 1.190051000  |
| 1  | 0.344117000  | 6.678881000  | -1.191828000 |
| 1  | 0.670533000  | 4.567020000  | -2.460851000 |
| 6  | -4.163407000 | -0.040526000 | -1.078767000 |
| 9  | -4.647475000 | 1.193819000  | -0.814379000 |
| 9  | -3.964252000 | -0.127226000 | -2.406641000 |
| 9  | -5.122059000 | -0.931381000 | -0.748137000 |
| 6  | -1.667293000 | -2.590234000 | 2.510767000  |
| 9  | -2.831814000 | -3.274236000 | 2.533301000  |
| 9  | -0.676163000 | -3.478863000 | 2.305354000  |
| 9  | -1.490815000 | -2.046510000 | 3.731421000  |

|   |             |              |              |
|---|-------------|--------------|--------------|
| 6 | 4.163161000 | -0.069359000 | 1.076769000  |
| 9 | 3.964478000 | -0.154612000 | 2.404821000  |
| 9 | 5.115705000 | -0.966498000 | 0.745487000  |
| 9 | 4.655121000 | 1.161748000  | 0.811881000  |
| 6 | 1.646277000 | -2.605403000 | -2.508077000 |
| 9 | 0.652737000 | -3.490016000 | -2.296412000 |
| 9 | 1.466165000 | -2.063299000 | -3.728819000 |
| 9 | 2.808091000 | -3.293835000 | -2.534711000 |

## 12

E=-3644.99359 a.u.

|    |              |              |              |
|----|--------------|--------------|--------------|
| 27 | -0.000224000 | 0.458854000  | -0.000494000 |
| 8  | -1.758640000 | 0.523244000  | -0.724733000 |
| 8  | -0.401745000 | -0.898731000 | 1.274639000  |
| 8  | 0.403315000  | -0.897829000 | -1.275886000 |
| 8  | 1.757876000  | 0.525510000  | 0.724175000  |
| 6  | -2.712661000 | -0.196885000 | -0.322103000 |
| 6  | -2.705029000 | -1.158683000 | 0.690123000  |
| 6  | -1.539130000 | -1.428563000 | 1.408546000  |
| 6  | 1.541147000  | -1.426970000 | -1.408780000 |
| 6  | 2.706372000  | -1.156094000 | -0.689635000 |
| 6  | 2.712711000  | -0.193962000 | 0.322275000  |
| 1  | -3.610887000 | -1.698985000 | 0.918866000  |
| 1  | 3.612763000  | -1.695802000 | -0.917676000 |
| 6  | -4.026391000 | 0.083374000  | -1.085433000 |
| 9  | -5.036557000 | -0.704661000 | -0.665156000 |
| 9  | -4.401232000 | 1.364255000  | -0.905528000 |
| 9  | -3.859769000 | -0.124190000 | -2.401711000 |
| 6  | -1.567232000 | -2.496857000 | 2.523561000  |
| 9  | -2.770200000 | -3.096990000 | 2.623750000  |
| 9  | -0.649894000 | -3.449688000 | 2.278201000  |
| 9  | -1.284292000 | -1.937357000 | 3.713078000  |
| 6  | 1.570652000  | -2.495753000 | -2.523286000 |
| 9  | 0.654846000  | -3.449908000 | -2.276957000 |
| 9  | 1.286429000  | -1.937506000 | -3.713009000 |
| 9  | 2.774510000  | -3.094101000 | -2.623475000 |
| 6  | 4.025884000  | 0.087837000  | 1.085984000  |
| 9  | 3.858694000  | -0.117894000 | 2.402413000  |
| 9  | 5.036604000  | -0.700339000 | 0.667319000  |
| 9  | 4.400271000  | 1.368682000  | 0.904414000  |
| 8  | 0.491105000  | 1.840462000  | -1.202715000 |
| 8  | -0.493528000 | 1.839654000  | 1.201973000  |
| 6  | -0.276468000 | 3.001619000  | 0.674432000  |
| 6  | -0.542179000 | 4.230017000  | 1.328158000  |
| 6  | -0.271654000 | 5.402697000  | 0.661795000  |
| 6  | 0.265120000  | 5.403142000  | -0.661848000 |

|   |              |             |              |
|---|--------------|-------------|--------------|
| 6 | 0.537009000  | 4.230900000 | -1.328429000 |
| 6 | 0.272715000  | 3.002082000 | -0.674929000 |
| 1 | -0.947951000 | 4.213707000 | 2.333926000  |
| 1 | -0.468392000 | 6.353697000 | 1.147082000  |
| 1 | 0.460750000  | 6.354468000 | -1.146941000 |
| 1 | 0.942803000  | 4.215237000 | -2.334197000 |

### 13

E=-3644.97636 a.u.

|    |              |              |              |
|----|--------------|--------------|--------------|
| 27 | -0.003453000 | 0.548661000  | -0.001033000 |
| 8  | -0.361202000 | 2.067281000  | 1.254797000  |
| 8  | 0.324804000  | 2.075083000  | -1.255435000 |
| 8  | 1.880454000  | 0.571540000  | 0.619944000  |
| 8  | 0.462729000  | -0.845996000 | -1.337808000 |
| 8  | -0.444825000 | -0.854213000 | 1.335764000  |
| 8  | -1.887484000 | 0.537702000  | -0.621675000 |
| 6  | 0.163755000  | 3.209748000  | -0.718454000 |
| 6  | 0.322690000  | 4.457522000  | -1.397340000 |
| 6  | 0.120557000  | 5.614318000  | -0.697936000 |
| 6  | -0.238468000 | 5.610311000  | 0.697647000  |
| 6  | -0.413801000 | 4.448981000  | 1.396939000  |
| 6  | -0.226252000 | 3.205257000  | 0.717867000  |
| 6  | 2.789294000  | -0.229644000 | 0.275640000  |
| 6  | 2.724886000  | -1.246059000 | -0.681445000 |
| 6  | 1.559292000  | -1.458973000 | -1.425227000 |
| 6  | -1.530935000 | -1.485063000 | 1.424924000  |
| 6  | -2.700144000 | -1.293434000 | 0.680987000  |
| 6  | -2.782290000 | -0.278884000 | -0.276884000 |
| 1  | 0.591951000  | 4.449275000  | -2.447953000 |
| 1  | 3.595509000  | -1.855999000 | -0.869140000 |
| 1  | -3.560192000 | -1.917893000 | 0.869410000  |
| 1  | 0.231714000  | 6.571711000  | -1.198019000 |
| 1  | -0.371673000 | 6.564932000  | 1.197415000  |
| 1  | -0.682956000 | 4.434145000  | 2.447571000  |
| 6  | 4.121394000  | 0.011672000  | 1.021475000  |
| 9  | 4.584979000  | 1.249812000  | 0.753143000  |
| 9  | 3.942203000  | -0.085839000 | 2.349823000  |
| 9  | 5.078689000  | -0.870365000 | 0.667096000  |
| 6  | 1.562179000  | -2.554011000 | -2.517224000 |
| 9  | 2.724726000  | -3.237958000 | -2.557870000 |
| 9  | 0.572810000  | -3.438955000 | -2.295864000 |
| 9  | 1.367700000  | -2.003940000 | -3.730575000 |
| 6  | -4.118745000 | -0.060109000 | -1.021468000 |
| 9  | -3.939633000 | -0.154259000 | -2.350217000 |
| 9  | -5.061033000 | -0.957815000 | -0.666350000 |
| 9  | -4.602425000 | 1.170272000  | -0.752284000 |

|   |              |              |             |
|---|--------------|--------------|-------------|
| 6 | -1.514945000 | -2.577847000 | 2.518983000 |
| 9 | -0.516705000 | -3.451772000 | 2.293154000 |
| 9 | -1.319513000 | -2.023510000 | 3.730220000 |
| 9 | -2.669322000 | -3.274994000 | 2.567837000 |

#### 14

E=-2277.13620 a.u.

|    |              |              |              |
|----|--------------|--------------|--------------|
| 27 | 0.623940000  | -0.018248000 | 0.051340000  |
| 7  | -1.004496000 | -0.637901000 | 1.127387000  |
| 8  | -1.049221000 | 0.557698000  | -1.180489000 |
| 8  | 0.584369000  | 1.727355000  | 1.123876000  |
| 8  | 2.018319000  | 0.846250000  | -1.150247000 |
| 8  | 1.967407000  | -0.896339000 | 1.300566000  |
| 8  | 0.746986000  | -1.687293000 | -1.142123000 |
| 6  | -2.159327000 | 0.296208000  | -0.681849000 |
| 6  | -3.421928000 | 0.622084000  | -1.301830000 |
| 6  | -4.584887000 | 0.282165000  | -0.681713000 |
| 6  | -4.607650000 | -0.397244000 | 0.594571000  |
| 6  | -3.459847000 | -0.732387000 | 1.240907000  |
| 6  | -2.188117000 | -0.403668000 | 0.644758000  |
| 6  | 1.379594000  | 2.707051000  | 1.010313000  |
| 6  | 2.382687000  | 2.873324000  | 0.049494000  |
| 6  | 2.618800000  | 1.942753000  | -0.972947000 |
| 6  | 2.754627000  | -1.841830000 | 0.991330000  |
| 6  | 2.705635000  | -2.634576000 | -0.159144000 |
| 6  | 1.693242000  | -2.521558000 | -1.126678000 |
| 1  | -3.399884000 | 1.130530000  | -2.259879000 |
| 1  | -0.984761000 | -1.102097000 | 2.036365000  |
| 1  | 2.979078000  | 3.778863000  | 0.074631000  |
| 1  | 3.448882000  | -3.415286000 | -0.279998000 |
| 1  | -5.535235000 | 0.522875000  | -1.149992000 |
| 1  | -5.570389000 | -0.638441000 | 1.034839000  |
| 1  | -3.476089000 | -1.241804000 | 2.200698000  |
| 1  | 3.545272000  | -2.068165000 | 1.724936000  |
| 1  | 1.707940000  | -3.253522000 | -1.951319000 |
| 1  | 3.401059000  | 2.191143000  | -1.708939000 |
| 1  | 1.249379000  | 3.518615000  | 1.744838000  |

#### 15

E=-2277.15655 a.u.

|    |              |              |              |
|----|--------------|--------------|--------------|
| 27 | 0.622544000  | -0.013185000 | 0.035438000  |
| 7  | -0.787395000 | -0.843249000 | 1.006141000  |
| 8  | -0.797134000 | 0.764267000  | -0.986140000 |
| 8  | 0.510882000  | 1.456278000  | 1.257459000  |
| 8  | 1.947776000  | 0.788579000  | -1.095001000 |
| 8  | 2.001110000  | -0.722425000 | 1.155690000  |

|   |              |              |              |
|---|--------------|--------------|--------------|
| 8 | 0.625366000  | -1.470522000 | -1.211409000 |
| 6 | -1.964184000 | 0.388116000  | -0.568246000 |
| 6 | -3.180919000 | 0.814906000  | -1.148777000 |
| 6 | -4.377950000 | 0.373524000  | -0.619254000 |
| 6 | -4.416845000 | -0.500647000 | 0.501481000  |
| 6 | -3.255451000 | -0.941330000 | 1.093960000  |
| 6 | -2.002308000 | -0.514806000 | 0.572579000  |
| 6 | 1.159911000  | 2.534920000  | 1.106248000  |
| 6 | 2.062559000  | 2.857114000  | 0.091348000  |
| 6 | 2.392989000  | 1.961731000  | -0.929817000 |
| 6 | 2.640628000  | -1.786084000 | 0.885311000  |
| 6 | 2.444754000  | -2.643836000 | -0.196590000 |
| 6 | 1.451142000  | -2.425381000 | -1.159274000 |
| 1 | -3.143453000 | 1.484747000  | -2.001482000 |
| 1 | -0.701555000 | -1.422669000 | 1.836153000  |
| 1 | 2.532040000  | 3.833455000  | 0.102530000  |
| 1 | 3.077389000  | -3.518414000 | -0.290397000 |
| 1 | -5.313062000 | 0.701149000  | -1.064041000 |
| 1 | -5.378001000 | -0.822686000 | 0.890307000  |
| 1 | -3.277852000 | -1.610395000 | 1.950090000  |
| 1 | 3.427896000  | -2.040777000 | 1.607555000  |
| 1 | 1.353176000  | -3.160471000 | -1.969868000 |
| 1 | 3.123698000  | 2.287715000  | -1.682556000 |
| 1 | 0.972817000  | 3.288305000  | 1.883282000  |

## 16

E=-2434.35434 a.u.

|    |              |              |              |
|----|--------------|--------------|--------------|
| 27 | 0.167426000  | -0.029949000 | 0.071867000  |
| 7  | -1.448409000 | -0.510321000 | 1.220807000  |
| 8  | -1.495557000 | 0.263376000  | -1.257392000 |
| 8  | 0.070405000  | 1.860666000  | 0.815781000  |
| 8  | 1.532875000  | 0.687037000  | -1.237370000 |
| 8  | 1.503736000  | -0.644599000 | 1.461741000  |
| 8  | 0.385839000  | -1.862743000 | -0.792565000 |
| 6  | -2.608298000 | 0.057240000  | -0.729626000 |
| 6  | -3.868680000 | 0.234059000  | -1.406325000 |
| 6  | -5.033193000 | -0.033263000 | -0.749685000 |
| 6  | -5.053702000 | -0.487409000 | 0.619506000  |
| 6  | -3.902266000 | -0.670441000 | 1.322673000  |
| 6  | -2.634961000 | -0.404644000 | 0.692210000  |
| 6  | 0.815160000  | 2.861528000  | 0.563946000  |
| 6  | 1.817972000  | 2.895453000  | -0.418887000 |
| 6  | 2.109371000  | 1.816179000  | -1.275460000 |
| 6  | 2.368862000  | -1.572623000 | 1.339592000  |
| 6  | 2.371411000  | -2.541326000 | 0.323469000  |
| 6  | 1.372226000  | -2.649089000 | -0.666358000 |

|   |              |              |              |
|---|--------------|--------------|--------------|
| 1 | -3.847908000 | 0.573916000  | -2.436471000 |
| 1 | -1.426813000 | -0.812242000 | 2.195237000  |
| 1 | 2.378103000  | 3.814022000  | -0.546143000 |
| 1 | 3.159226000  | -3.285152000 | 0.332582000  |
| 1 | -5.982417000 | 0.095082000  | -1.262533000 |
| 1 | -6.013868000 | -0.682786000 | 1.087382000  |
| 1 | -3.916327000 | -1.010674000 | 2.354837000  |
| 6 | 3.173866000  | 1.975904000  | -2.340660000 |
| 1 | 3.635810000  | 2.965786000  | -2.327827000 |
| 1 | 3.946390000  | 1.213162000  | -2.195140000 |
| 1 | 2.726076000  | 1.797958000  | -3.324256000 |
| 6 | 0.554170000  | 4.093369000  | 1.405436000  |
| 1 | 1.203188000  | 4.930653000  | 1.138502000  |
| 1 | -0.492167000 | 4.395580000  | 1.288545000  |
| 1 | 0.702771000  | 3.844165000  | 2.461808000  |
| 6 | 3.443790000  | -1.605290000 | 2.405460000  |
| 1 | 4.146320000  | -2.430294000 | 2.267718000  |
| 1 | 3.992071000  | -0.657003000 | 2.391607000  |
| 1 | 2.974169000  | -1.690551000 | 3.391399000  |
| 6 | 1.434739000  | -3.789401000 | -1.660897000 |
| 1 | 1.534274000  | -3.374351000 | -2.669909000 |
| 1 | 2.266024000  | -4.471537000 | -1.468662000 |
| 1 | 0.492262000  | -4.346246000 | -1.632655000 |

## 17

E=-2434.37650 a.u.

|    |              |              |              |
|----|--------------|--------------|--------------|
| 27 | -0.220602000 | -0.018742000 | -0.053308000 |
| 7  | 1.174853000  | -0.721417000 | -1.143121000 |
| 8  | 1.219247000  | 0.511639000  | 1.101880000  |
| 8  | -0.039996000 | 1.633611000  | -0.989191000 |
| 8  | -1.522054000 | 0.633800000  | 1.181705000  |
| 8  | -1.599364000 | -0.475820000 | -1.285352000 |
| 8  | -0.302247000 | -1.667382000 | 0.908123000  |
| 6  | 2.375166000  | 0.172337000  | 0.629701000  |
| 6  | 3.601371000  | 0.445545000  | 1.280620000  |
| 6  | 4.788434000  | 0.057549000  | 0.689629000  |
| 6  | 4.808894000  | -0.610674000 | -0.564767000 |
| 6  | 3.638513000  | -0.897717000 | -1.230495000 |
| 6  | 2.394737000  | -0.520322000 | -0.651368000 |
| 6  | -0.640929000 | 2.712877000  | -0.677072000 |
| 6  | -1.545237000 | 2.874086000  | 0.381891000  |
| 6  | -1.931764000 | 1.836478000  | 1.244161000  |
| 6  | -2.313158000 | -1.532336000 | -1.218185000 |
| 6  | -2.158993000 | -2.563833000 | -0.284213000 |
| 6  | -1.168200000 | -2.575516000 | 0.714253000  |
| 1  | 3.578441000  | 0.958433000  | 2.236629000  |

|   |              |              |              |
|---|--------------|--------------|--------------|
| 1 | 1.080589000  | -1.150743000 | -2.058966000 |
| 1 | -1.974489000 | 3.855389000  | 0.539786000  |
| 1 | -2.834916000 | -3.407766000 | -0.339817000 |
| 1 | 5.729411000  | 0.267879000  | 1.189805000  |
| 1 | 5.762153000  | -0.897070000 | -0.998602000 |
| 1 | 3.646896000  | -1.409060000 | -2.189641000 |
| 6 | -0.308140000 | 3.888698000  | -1.566799000 |
| 1 | 0.769704000  | 4.077735000  | -1.527546000 |
| 1 | -0.557185000 | 3.638582000  | -2.603319000 |
| 1 | -0.845132000 | 4.792808000  | -1.273364000 |
| 6 | -2.913485000 | 2.111481000  | 2.359797000  |
| 1 | -3.759882000 | 1.421809000  | 2.278895000  |
| 1 | -2.425795000 | 1.915627000  | 3.320756000  |
| 1 | -3.279093000 | 3.140124000  | 2.344569000  |
| 6 | -3.399890000 | -1.618076000 | -2.265187000 |
| 1 | -2.959017000 | -1.502252000 | -3.260502000 |
| 1 | -3.946857000 | -2.561669000 | -2.217046000 |
| 1 | -4.100424000 | -0.787935000 | -2.123686000 |
| 6 | -1.075488000 | -3.746980000 | 1.664853000  |
| 1 | -1.812229000 | -4.520481000 | 1.439613000  |
| 1 | -0.069123000 | -4.175133000 | 1.616775000  |
| 1 | -1.226428000 | -3.388679000 | 2.688595000  |

## 18

E=-3625.11931 a.u.

|    |              |              |              |
|----|--------------|--------------|--------------|
| 27 | 0.218978000  | 0.557352000  | 0.083878000  |
| 7  | 0.706033000  | 2.169914000  | 1.294686000  |
| 8  | 1.115635000  | 1.970026000  | -1.273646000 |
| 8  | 2.035398000  | -0.266296000 | 0.579910000  |
| 8  | 0.045759000  | -0.955314000 | -1.284189000 |
| 8  | -0.817564000 | -0.466032000 | 1.519300000  |
| 8  | -1.598622000 | 1.286453000  | -0.548621000 |
| 6  | 1.511931000  | 3.014797000  | -0.741301000 |
| 6  | 2.170768000  | 4.087752000  | -1.454656000 |
| 6  | 2.567338000  | 5.193346000  | -0.775573000 |
| 6  | 2.359564000  | 5.348094000  | 0.654758000  |
| 6  | 1.751569000  | 4.391010000  | 1.395518000  |
| 6  | 1.295598000  | 3.179898000  | 0.747028000  |
| 6  | 2.494063000  | -1.380489000 | 0.213977000  |
| 6  | 1.947259000  | -2.279803000 | -0.706251000 |
| 6  | 0.764491000  | -1.977859000 | -1.397619000 |
| 6  | -2.050859000 | -0.723452000 | 1.505765000  |
| 6  | -3.031830000 | -0.196236000 | 0.659680000  |
| 6  | -2.722183000 | 0.792837000  | -0.286042000 |
| 1  | 2.323998000  | 3.968554000  | -2.521746000 |
| 1  | 0.559558000  | 2.242116000  | 2.303418000  |

|   |              |              |              |
|---|--------------|--------------|--------------|
| 1 | 2.462383000  | -3.205314000 | -0.915375000 |
| 1 | -4.056098000 | -0.518261000 | 0.772434000  |
| 1 | 3.060824000  | 6.002530000  | -1.306409000 |
| 1 | 2.707561000  | 6.261741000  | 1.126719000  |
| 1 | 1.597478000  | 4.506947000  | 2.464626000  |
| 6 | 3.852373000  | -1.724242000 | 0.866601000  |
| 9 | 4.793961000  | -0.837373000 | 0.469421000  |
| 9 | 3.768764000  | -1.655100000 | 2.209049000  |
| 9 | 4.298156000  | -2.957417000 | 0.547357000  |
| 6 | 0.255056000  | -2.977689000 | -2.462731000 |
| 9 | 0.978520000  | -4.118628000 | -2.500916000 |
| 9 | -1.025276000 | -3.315552000 | -2.218868000 |
| 9 | 0.309897000  | -2.420963000 | -3.690277000 |
| 6 | -3.877970000 | 1.421811000  | -1.099886000 |
| 9 | -3.644017000 | 1.315663000  | -2.419549000 |
| 9 | -5.074151000 | 0.848042000  | -0.847224000 |
| 9 | -3.990009000 | 2.737358000  | -0.805092000 |
| 6 | -2.480820000 | -1.725186000 | 2.601828000  |
| 9 | -1.810147000 | -2.885631000 | 2.470582000  |
| 9 | -2.204593000 | -1.224938000 | 3.826084000  |
| 9 | -3.800358000 | -2.009290000 | 2.568346000  |

## 19

E=-3625.12493 a.u.

|    |              |              |              |
|----|--------------|--------------|--------------|
| 27 | -0.068684000 | 0.484932000  | -0.066724000 |
| 8  | -1.827640000 | 0.202924000  | -0.744461000 |
| 8  | -0.192823000 | -0.917476000 | 1.247135000  |
| 8  | 0.557288000  | -0.798185000 | -1.348907000 |
| 8  | 1.670601000  | 0.837939000  | 0.643196000  |
| 6  | -2.633594000 | -0.653312000 | -0.284299000 |
| 6  | -2.439888000 | -1.561163000 | 0.756357000  |
| 6  | -1.220605000 | -1.619377000 | 1.437485000  |
| 6  | 1.753231000  | -1.200878000 | -1.419007000 |
| 6  | 2.847763000  | -0.787035000 | -0.660697000 |
| 6  | 2.710885000  | 0.214653000  | 0.306832000  |
| 1  | -3.237508000 | -2.233900000 | 1.031829000  |
| 1  | 3.815758000  | -1.232247000 | -0.833311000 |
| 6  | -3.992797000 | -0.628652000 | -1.017525000 |
| 9  | -4.842364000 | -1.566863000 | -0.552907000 |
| 9  | -4.582221000 | 0.572159000  | -0.863707000 |
| 9  | -3.821131000 | -0.844066000 | -2.333951000 |
| 6  | -1.040619000 | -2.653986000 | 2.570505000  |
| 9  | -2.131183000 | -3.431361000 | 2.731107000  |
| 9  | 0.003422000  | -3.460655000 | 2.301767000  |
| 9  | -0.800826000 | -2.033616000 | 3.738777000  |
| 6  | 1.961344000  | -2.257907000 | -2.524850000 |



|   |              |              |              |
|---|--------------|--------------|--------------|
| 9 | 1.038346000  | -3.228383000 | -2.434894000 |
| 9 | 1.844550000  | -1.678956000 | -3.738739000 |
| 9 | 3.178157000  | -2.833674000 | -2.460542000 |
| 6 | 3.959998000  | 0.680429000  | 1.089297000  |
| 9 | 3.780373000  | 0.508972000  | 2.408197000  |
| 9 | 5.068929000  | 0.001751000  | 0.729056000  |
| 9 | 4.186902000  | 1.988167000  | 0.860776000  |
| 7 | 0.100388000  | 1.954758000  | -1.245856000 |
| 8 | -0.764677000 | 1.758833000  | 1.147609000  |
| 6 | -0.791108000 | 2.958227000  | 0.642971000  |
| 6 | -1.252622000 | 4.091558000  | 1.345421000  |
| 6 | -1.265863000 | 5.316364000  | 0.707681000  |
| 6 | -0.827924000 | 5.460577000  | -0.638800000 |
| 6 | -0.366377000 | 4.380145000  | -1.353020000 |
| 6 | -0.326639000 | 3.105104000  | -0.725011000 |
| 1 | -1.590124000 | 3.972297000  | 2.369255000  |
| 1 | 0.372765000  | 1.918458000  | -2.224100000 |
| 1 | -1.621228000 | 6.192641000  | 1.241297000  |
| 1 | -0.859379000 | 6.440989000  | -1.103403000 |
| 1 | -0.028195000 | 4.483249000  | -2.380131000 |

## 20

E=-3625.10976 a.u.

|    |              |              |              |
|----|--------------|--------------|--------------|
| 27 | 0.214431000  | 0.588398000  | 0.086923000  |
| 7  | 0.451880000  | 2.056957000  | 1.201264000  |
| 8  | 1.174317000  | 1.709924000  | -1.180621000 |
| 8  | 2.051721000  | -0.278722000 | 0.710011000  |
| 8  | -0.004153000 | -0.836134000 | -1.175303000 |
| 8  | -0.684071000 | -0.433800000 | 1.461470000  |
| 8  | -1.690187000 | 1.254865000  | -0.626475000 |
| 6  | 1.513534000  | 2.829776000  | -0.694481000 |
| 6  | 2.235663000  | 3.840907000  | -1.399745000 |
| 6  | 2.545328000  | 4.998732000  | -0.742783000 |
| 6  | 2.168708000  | 5.232470000  | 0.629343000  |
| 6  | 1.475487000  | 4.303297000  | 1.348019000  |
| 6  | 1.122661000  | 3.074391000  | 0.704871000  |
| 6  | 2.539691000  | -1.311697000 | 0.207025000  |
| 6  | 2.003889000  | -2.104638000 | -0.824882000 |
| 6  | 0.784210000  | -1.796363000 | -1.419240000 |
| 6  | -1.921865000 | -0.712825000 | 1.511047000  |
| 6  | -2.965589000 | -0.246510000 | 0.721385000  |
| 6  | -2.763423000 | 0.723316000  | -0.284042000 |
| 1  | 2.517771000  | 3.660124000  | -2.431035000 |
| 1  | 0.147132000  | 2.112477000  | 2.173536000  |
| 1  | 2.543219000  | -2.978583000 | -1.157077000 |
| 1  | -3.963468000 | -0.614631000 | 0.906031000  |

|   |              |              |              |
|---|--------------|--------------|--------------|
| 1 | 3.095823000  | 5.777606000  | -1.262088000 |
| 1 | 2.449252000  | 6.174444000  | 1.089592000  |
| 1 | 1.189090000  | 4.474651000  | 2.381397000  |
| 6 | 3.904025000  | -1.722406000 | 0.815639000  |
| 9 | 4.393881000  | -2.865621000 | 0.289915000  |
| 9 | 4.818614000  | -0.751571000 | 0.598817000  |
| 9 | 3.796759000  | -1.896528000 | 2.145707000  |
| 6 | 0.249517000  | -2.712963000 | -2.541396000 |
| 9 | 1.064348000  | -3.760001000 | -2.789174000 |
| 9 | -0.959518000 | -3.206096000 | -2.209661000 |
| 9 | 0.114798000  | -2.020559000 | -3.688935000 |
| 6 | -2.244588000 | -1.689458000 | 2.663035000  |
| 9 | -1.478712000 | -2.791617000 | 2.584575000  |
| 9 | -1.995883000 | -1.096661000 | 3.853244000  |
| 9 | -3.534184000 | -2.084239000 | 2.668945000  |
| 6 | -4.001797000 | 1.244753000  | -1.058047000 |
| 9 | -3.848794000 | 1.055199000  | -2.379880000 |
| 9 | -5.150610000 | 0.639102000  | -0.685559000 |
| 9 | -4.154685000 | 2.570024000  | -0.843544000 |

## 21

E=-3625.11015 a.u.

|    |              |              |              |
|----|--------------|--------------|--------------|
| 27 | 0.227127000  | 0.480666000  | 0.047660000  |
| 8  | 1.938207000  | -0.230517000 | 0.675906000  |
| 8  | 0.037332000  | -0.962850000 | -1.238036000 |
| 8  | -0.841608000 | -0.595284000 | 1.523076000  |
| 8  | -1.485495000 | 1.189192000  | -0.630856000 |
| 6  | 2.474184000  | -1.302881000 | 0.280336000  |
| 6  | 2.020242000  | -2.182269000 | -0.705347000 |
| 6  | 0.829998000  | -1.927734000 | -1.396382000 |
| 6  | -2.080732000 | -0.768044000 | 1.489243000  |
| 6  | -3.014081000 | -0.180207000 | 0.616205000  |
| 6  | -2.636524000 | 0.753496000  | -0.350163000 |
| 1  | 2.597135000  | -3.063576000 | -0.941742000 |
| 1  | -4.057261000 | -0.442427000 | 0.709155000  |
| 6  | 3.801050000  | -1.611574000 | 1.005665000  |
| 9  | 4.390060000  | -2.740358000 | 0.560051000  |
| 9  | 4.678994000  | -0.599787000 | 0.831600000  |
| 9  | 3.594868000  | -1.751523000 | 2.329090000  |
| 6  | 0.392310000  | -2.896621000 | -2.516722000 |
| 9  | 1.205223000  | -3.971475000 | -2.615672000 |
| 9  | -0.855837000 | -3.346876000 | -2.292100000 |
| 9  | 0.400604000  | -2.269027000 | -3.708168000 |
| 6  | -2.605929000 | -1.734148000 | 2.580087000  |
| 9  | -2.014297000 | -2.938359000 | 2.471632000  |
| 9  | -2.323126000 | -1.244039000 | 3.807955000  |

|   |              |              |              |
|---|--------------|--------------|--------------|
| 9 | -3.941932000 | -1.928559000 | 2.521414000  |
| 6 | -3.741737000 | 1.410618000  | -1.208547000 |
| 9 | -3.494584000 | 1.237530000  | -2.518969000 |
| 9 | -4.971381000 | 0.913818000  | -0.954300000 |
| 9 | -3.787900000 | 2.742269000  | -0.970817000 |
| 7 | 0.484700000  | 2.046648000  | 1.164668000  |
| 8 | 1.339143000  | 1.882806000  | -1.313817000 |
| 6 | 1.588102000  | 2.935559000  | -0.719823000 |
| 6 | 2.313218000  | 4.048713000  | -1.303190000 |
| 6 | 2.540765000  | 5.163207000  | -0.565467000 |
| 6 | 2.080539000  | 5.294926000  | 0.806665000  |
| 6 | 1.397533000  | 4.304162000  | 1.428913000  |
| 6 | 1.116491000  | 3.081151000  | 0.710615000  |
| 1 | 2.655281000  | 3.945018000  | -2.327773000 |
| 1 | 0.164050000  | 2.106795000  | 2.133926000  |
| 1 | 3.085118000  | 5.996505000  | -0.999881000 |
| 1 | 2.296725000  | 6.219130000  | 1.334040000  |
| 1 | 1.054143000  | 4.404612000  | 2.454616000  |

## 22

E=-2257.26601 a.u.

|    |              |              |              |
|----|--------------|--------------|--------------|
| 27 | -0.624133000 | -0.000022000 | -0.000041000 |
| 7  | 0.808621000  | 0.777238000  | 0.987481000  |
| 7  | 0.808658000  | -0.777213000 | -0.987551000 |
| 8  | -0.595512000 | -1.469313000 | 1.239939000  |
| 8  | -1.981381000 | -0.762156000 | -1.142051000 |
| 8  | -1.981444000 | 0.762044000  | 1.141954000  |
| 8  | -0.595513000 | 1.469445000  | -1.239865000 |
| 6  | 2.031513000  | -0.428766000 | -0.588766000 |
| 6  | 3.270536000  | -0.809067000 | -1.169002000 |
| 6  | 4.452006000  | -0.400885000 | -0.586410000 |
| 6  | 4.451984000  | 0.400919000  | 0.586477000  |
| 6  | 3.270491000  | 0.809087000  | 1.169032000  |
| 6  | 2.031491000  | 0.428791000  | 0.588745000  |
| 6  | -1.347742000 | -2.481154000 | 1.137436000  |
| 6  | -2.296157000 | -2.749812000 | 0.144576000  |
| 6  | -2.544505000 | -1.875235000 | -0.915502000 |
| 6  | -2.544618000 | 1.875114000  | 0.915479000  |
| 6  | -2.296264000 | 2.749797000  | -0.144505000 |
| 6  | -1.347773000 | 2.481257000  | -1.137325000 |
| 1  | 3.271487000  | -1.430793000 | -2.060251000 |
| 1  | 0.707910000  | 1.298714000  | 1.852637000  |
| 1  | -2.861897000 | -3.672205000 | 0.202997000  |
| 1  | -2.862035000 | 3.672173000  | -0.202872000 |
| 1  | 5.399514000  | -0.699051000 | -1.025073000 |
| 1  | 5.399475000  | 0.699094000  | 1.025171000  |

|   |              |              |              |
|---|--------------|--------------|--------------|
| 1 | 3.271407000  | 1.430809000  | 2.060285000  |
| 1 | -3.308062000 | 2.165272000  | 1.650835000  |
| 1 | -1.221084000 | 3.225715000  | -1.935497000 |
| 1 | -3.307901000 | -2.165503000 | -1.650864000 |
| 1 | -1.221103000 | -3.225525000 | 1.935696000  |
| 1 | 0.707979000  | -1.298710000 | -1.852697000 |

## 23

E=-2257.28289 a.u.

|    |              |              |              |
|----|--------------|--------------|--------------|
| 27 | -0.601517000 | -0.000053000 | -0.000346000 |
| 7  | 1.037781000  | -0.498041000 | -1.188445000 |
| 7  | 1.037585000  | 0.497586000  | 1.188447000  |
| 8  | -0.694140000 | 1.764425000  | -1.093060000 |
| 8  | -1.984760000 | 0.828943000  | 1.271704000  |
| 8  | -1.983162000 | -0.829919000 | -1.273147000 |
| 8  | -0.695501000 | -1.763365000 | 1.094433000  |
| 6  | 2.216365000  | 0.273560000  | 0.694460000  |
| 6  | 3.487850000  | 0.501994000  | 1.343456000  |
| 6  | 4.645083000  | 0.250982000  | 0.678378000  |
| 6  | 4.645196000  | -0.251332000 | -0.677806000 |
| 6  | 3.488073000  | -0.502358000 | -1.343075000 |
| 6  | 2.216487000  | -0.273922000 | -0.694296000 |
| 6  | -1.599308000 | 2.641063000  | -1.004825000 |
| 6  | -2.608026000 | 2.726644000  | -0.033918000 |
| 6  | -2.714438000 | 1.836381000  | 1.042245000  |
| 6  | -2.713445000 | -1.836879000 | -1.043285000 |
| 6  | -2.608535000 | -2.725922000 | 0.033990000  |
| 6  | -1.600901000 | -2.639692000 | 1.006032000  |
| 1  | 3.491160000  | 0.882954000  | 2.360934000  |
| 1  | 1.027409000  | -0.844705000 | -2.147910000 |
| 1  | -3.308837000 | 3.552818000  | -0.091157000 |
| 1  | -3.309721000 | -3.551772000 | 0.091346000  |
| 1  | 5.599860000  | 0.429548000  | 1.164027000  |
| 1  | 5.600055000  | -0.429891000 | -1.163298000 |
| 1  | 3.491556000  | -0.883319000 | -2.360552000 |
| 1  | -3.504871000 | -2.041010000 | -1.784255000 |
| 1  | -1.581217000 | -3.435115000 | 1.770721000  |
| 1  | -3.506630000 | 2.039925000  | 1.782569000  |
| 1  | -1.578324000 | 3.437286000  | -1.768640000 |
| 1  | 1.027078000  | 0.844118000  | 2.147960000  |

## 24

E=-2257.26081 a.u.

|    |              |              |              |
|----|--------------|--------------|--------------|
| 27 | 0.555428000  | 0.000124000  | 0.000998000  |
| 7  | -0.968554000 | 0.582657000  | -1.120493000 |
| 7  | -0.969065000 | -0.580959000 | 1.121430000  |

|   |              |              |              |
|---|--------------|--------------|--------------|
| 8 | 0.683593000  | -1.776975000 | -1.142216000 |
| 8 | 1.921928000  | -0.753933000 | 1.242362000  |
| 8 | 1.926036000  | 0.748803000  | -1.238032000 |
| 8 | 0.685910000  | 1.777179000  | 1.142955000  |
| 6 | -2.167617000 | -0.321719000 | 0.665088000  |
| 6 | -3.425725000 | -0.602539000 | 1.299849000  |
| 6 | -4.587657000 | -0.302217000 | 0.653082000  |
| 6 | -4.587385000 | 0.300771000  | -0.655383000 |
| 6 | -3.424948000 | 0.602984000  | -1.300544000 |
| 6 | -2.167270000 | 0.323764000  | -0.664666000 |
| 6 | 1.594309000  | -2.634440000 | -1.015180000 |
| 6 | 2.583237000  | -2.681902000 | -0.014744000 |
| 6 | 2.660836000  | -1.765960000 | 1.035555000  |
| 6 | 2.662146000  | 1.763799000  | -1.035208000 |
| 6 | 2.581539000  | 2.684315000  | 0.010505000  |
| 6 | 1.594062000  | 2.636776000  | 1.012086000  |
| 1 | -3.428603000 | -1.061959000 | 2.284048000  |
| 1 | -0.916350000 | 0.992291000  | -2.052382000 |
| 1 | 3.300526000  | -3.495277000 | -0.038693000 |
| 1 | 3.295918000  | 3.500336000  | 0.030749000  |
| 1 | -5.541200000 | -0.520431000 | 1.124031000  |
| 1 | -5.540743000 | 0.517017000  | -1.127657000 |
| 1 | -3.427440000 | 1.062144000  | -2.285165000 |
| 1 | 3.445524000  | 1.932118000  | -1.791428000 |
| 1 | 1.609097000  | 3.451547000  | 1.757772000  |
| 1 | 3.443621000  | -1.936314000 | 1.791635000  |
| 1 | 1.610406000  | -3.447324000 | -1.762533000 |
| 1 | -0.916882000 | -0.991766000 | 2.052917000  |

## 25

E=-2414.48273 a.u.

|    |              |              |              |
|----|--------------|--------------|--------------|
| 27 | 0.118614000  | -0.000179000 | 0.000087000  |
| 7  | -1.515492000 | -0.255727000 | 1.260541000  |
| 7  | -1.515508000 | 0.253659000  | -1.260891000 |
| 8  | 0.231578000  | 1.933736000  | 0.706858000  |
| 8  | 1.485239000  | 0.579680000  | -1.403349000 |
| 8  | 1.484419000  | -0.579252000 | 1.404424000  |
| 8  | 0.234488000  | -1.933662000 | -0.707856000 |
| 6  | -2.697586000 | 0.134652000  | -0.732772000 |
| 6  | -3.967385000 | 0.239585000  | -1.412049000 |
| 6  | -5.127008000 | 0.117917000  | -0.712312000 |
| 6  | -5.127007000 | -0.120774000 | 0.711848000  |
| 6  | -3.967376000 | -0.242177000 | 1.411622000  |
| 6  | -2.697586000 | -0.136930000 | 0.732389000  |
| 6  | 1.157671000  | 2.776367000  | 0.500909000  |
| 6  | 2.174575000  | 2.649998000  | -0.465777000 |

|   |              |              |              |
|---|--------------|--------------|--------------|
| 6 | 2.267301000  | 1.580823000  | -1.374771000 |
| 6 | 2.267990000  | -1.579258000 | 1.375754000  |
| 6 | 2.177520000  | -2.647911000 | 0.465973000  |
| 6 | 1.161522000  | -2.775131000 | -0.501617000 |
| 1 | -3.970672000 | 0.423226000  | -2.482986000 |
| 1 | -1.503641000 | -0.416132000 | 2.267693000  |
| 1 | 2.900395000  | 3.450713000  | -0.546032000 |
| 1 | 2.904376000  | -3.447679000 | 0.546304000  |
| 1 | -6.081130000 | 0.202392000  | -1.224138000 |
| 1 | -6.081128000 | -0.205454000 | 1.223644000  |
| 1 | -3.970656000 | -0.425802000 | 2.482562000  |
| 1 | -1.503651000 | 0.413884000  | -2.268070000 |
| 6 | 3.356528000  | -1.590764000 | 2.430262000  |
| 1 | 2.897222000  | -1.552757000 | 3.424153000  |
| 1 | 3.998234000  | -2.472492000 | 2.364195000  |
| 1 | 3.968501000  | -0.688453000 | 2.324191000  |
| 6 | 1.128422000  | -4.014111000 | -1.374983000 |
| 1 | 1.918780000  | -4.726191000 | -1.126138000 |
| 1 | 0.153923000  | -4.503421000 | -1.272028000 |
| 1 | 1.230802000  | -3.714502000 | -2.423857000 |
| 6 | 3.356706000  | 1.593212000  | -2.428382000 |
| 1 | 3.970175000  | 0.692084000  | -2.320905000 |
| 1 | 2.898310000  | 1.553423000  | -3.422621000 |
| 1 | 3.996806000  | 2.476127000  | -2.362613000 |
| 6 | 1.122193000  | 4.015707000  | 1.373660000  |
| 1 | 0.146914000  | 4.503338000  | 1.270149000  |
| 1 | 1.224718000  | 3.716773000  | 2.422716000  |
| 1 | 1.911456000  | 4.728981000  | 1.124761000  |

## 26

E=-2414.50216 a.u.

|    |              |              |              |
|----|--------------|--------------|--------------|
| 27 | 0.212114000  | -0.000107000 | 0.000476000  |
| 7  | -1.225419000 | 0.580464000  | -1.113959000 |
| 7  | -1.224982000 | -0.583506000 | 1.113942000  |
| 8  | 0.189245000  | -1.670007000 | -0.936930000 |
| 8  | 1.561559000  | -0.551074000 | 1.255177000  |
| 8  | 1.561277000  | 0.552942000  | -1.253657000 |
| 8  | 0.185323000  | 1.669446000  | 0.937749000  |
| 6  | -2.447370000 | -0.317562000 | 0.656927000  |
| 6  | -3.687421000 | -0.588472000 | 1.294482000  |
| 6  | -4.869913000 | -0.292953000 | 0.648215000  |
| 6  | -4.870078000 | 0.285168000  | -0.649137000 |
| 6  | -3.687839000 | 0.582219000  | -1.295129000 |
| 6  | -2.447624000 | 0.312966000  | -0.657220000 |
| 6  | 0.941244000  | -2.661603000 | -0.678614000 |
| 6  | 1.897035000  | -2.726186000 | 0.348971000  |

|   |              |              |              |
|---|--------------|--------------|--------------|
| 6 | 2.152035000  | -1.679994000 | 1.247002000  |
| 6 | 2.147548000  | 1.684082000  | -1.246839000 |
| 6 | 1.888532000  | 2.730515000  | -0.350137000 |
| 6 | 0.933487000  | 2.663612000  | 0.677857000  |
| 1 | -3.688610000 | -1.039096000 | 2.283531000  |
| 1 | -1.128645000 | 0.943162000  | -2.057085000 |
| 1 | 2.470416000  | -3.638765000 | 0.452967000  |
| 1 | 2.458782000  | 3.644929000  | -0.455296000 |
| 1 | -5.817118000 | -0.508472000 | 1.133633000  |
| 1 | -5.817448000 | 0.499493000  | -1.134841000 |
| 1 | -3.689436000 | 1.032762000  | -2.284209000 |
| 1 | -1.127964000 | -0.945886000 | 2.057215000  |
| 6 | 0.742714000  | -3.850530000 | -1.591887000 |
| 1 | -0.301840000 | -4.174729000 | -1.541298000 |
| 1 | 0.938612000  | -3.546874000 | -2.625545000 |
| 1 | 1.394989000  | -4.686404000 | -1.330994000 |
| 6 | 3.204744000  | -1.850466000 | 2.319161000  |
| 1 | 3.980554000  | -1.088676000 | 2.187032000  |
| 1 | 2.753480000  | -1.683998000 | 3.302886000  |
| 1 | 3.664366000  | -2.840625000 | 2.294770000  |
| 6 | 3.200623000  | 1.856696000  | -2.318328000 |
| 1 | 2.751134000  | 1.685361000  | -3.301995000 |
| 1 | 3.655562000  | 2.849019000  | -2.296053000 |
| 1 | 3.979866000  | 1.098928000  | -2.183287000 |
| 6 | 0.731422000  | 3.852491000  | 1.590385000  |
| 1 | 1.381318000  | 4.690101000  | 1.329274000  |
| 1 | -0.314123000 | 4.173597000  | 1.539264000  |
| 1 | 0.927774000  | 3.550030000  | 2.624348000  |

## 27

E=-3605.25250 a.u.

|    |              |              |              |
|----|--------------|--------------|--------------|
| 27 | 0.277005000  | 0.586075000  | -0.015893000 |
| 7  | 0.795456000  | 2.167291000  | 1.251565000  |
| 7  | 1.086494000  | 2.012004000  | -1.316447000 |
| 8  | 2.058601000  | -0.309710000 | 0.568641000  |
| 8  | 0.142134000  | -0.929739000 | -1.407520000 |
| 8  | -0.742309000 | -0.486976000 | 1.421739000  |
| 8  | -1.589632000 | 1.286192000  | -0.604868000 |
| 6  | 1.477117000  | 3.126325000  | -0.790133000 |
| 6  | 2.016661000  | 4.273489000  | -1.491224000 |
| 6  | 2.432398000  | 5.356196000  | -0.791206000 |
| 6  | 2.346478000  | 5.409389000  | 0.656784000  |
| 6  | 1.835280000  | 4.383861000  | 1.379323000  |
| 6  | 1.349172000  | 3.198709000  | 0.703085000  |
| 6  | 2.445026000  | -1.469883000 | 0.283384000  |
| 6  | 1.887045000  | -2.368465000 | -0.635989000 |

|   |              |              |              |
|---|--------------|--------------|--------------|
| 6 | 0.789513000  | -2.007159000 | -1.427312000 |
| 6 | -1.975068000 | -0.730868000 | 1.459596000  |
| 6 | -2.987422000 | -0.184892000 | 0.660698000  |
| 6 | -2.705254000 | 0.800328000  | -0.295402000 |
| 1 | 2.087430000  | 4.235252000  | -2.574343000 |
| 1 | 0.732675000  | 2.197040000  | 2.270060000  |
| 1 | 2.340356000  | -3.339277000 | -0.769316000 |
| 1 | -4.009836000 | -0.495827000 | 0.814323000  |
| 1 | 2.846310000  | 6.213488000  | -1.313400000 |
| 1 | 2.702461000  | 6.303088000  | 1.160320000  |
| 1 | 1.767596000  | 4.429400000  | 2.462356000  |
| 6 | 3.733153000  | -1.890179000 | 1.030140000  |
| 9 | 4.775015000  | -1.131924000 | 0.614395000  |
| 9 | 3.601090000  | -1.707769000 | 2.357005000  |
| 9 | 4.068183000  | -3.182219000 | 0.825836000  |
| 6 | 0.297348000  | -3.002552000 | -2.503863000 |
| 9 | 0.924567000  | -4.197643000 | -2.446328000 |
| 9 | -1.023095000 | -3.228803000 | -2.375071000 |
| 9 | 0.509899000  | -2.493561000 | -3.738532000 |
| 6 | -3.886276000 | 1.434341000  | -1.067922000 |
| 9 | -3.707226000 | 1.312773000  | -2.397206000 |
| 9 | -5.079490000 | 0.879903000  | -0.763966000 |
| 9 | -3.970603000 | 2.754726000  | -0.785267000 |
| 6 | -2.370411000 | -1.736592000 | 2.565977000  |
| 9 | -1.691463000 | -2.890884000 | 2.422639000  |
| 9 | -2.071625000 | -1.231443000 | 3.783432000  |
| 9 | -3.687880000 | -2.034863000 | 2.564528000  |
| 1 | 1.142409000  | 1.969204000  | -2.334722000 |

## 28

E=-3605.25353 a.u.

|    |              |              |              |
|----|--------------|--------------|--------------|
| 27 | 0.233109000  | 0.474785000  | -0.012444000 |
| 8  | 1.905309000  | -0.149212000 | 0.679536000  |
| 8  | 0.024000000  | -1.024984000 | -1.221787000 |
| 8  | -0.600197000 | -0.554572000 | 1.402126000  |
| 8  | -1.433014000 | 1.113470000  | -0.705708000 |
| 6  | 2.450931000  | -1.234903000 | 0.347539000  |
| 6  | 2.015049000  | -2.181991000 | -0.583814000 |
| 6  | 0.830169000  | -1.992040000 | -1.297650000 |
| 6  | -1.846892000 | -0.663716000 | 1.559304000  |
| 6  | -2.863562000 | -0.070303000 | 0.808367000  |
| 6  | -2.562988000 | 0.774399000  | -0.264234000 |
| 1  | 2.604869000  | -3.069702000 | -0.754242000 |
| 1  | -3.895401000 | -0.261308000 | 1.060956000  |
| 6  | 3.781156000  | -1.478469000 | 1.095584000  |
| 9  | 4.327650000  | -2.673349000 | 0.790424000  |



|   |              |              |              |
|---|--------------|--------------|--------------|
| 9 | 4.675931000  | -0.523909000 | 0.773834000  |
| 9 | 3.589240000  | -1.440566000 | 2.424923000  |
| 6 | 0.397043000  | -3.052763000 | -2.332505000 |
| 9 | 1.246097000  | -4.098469000 | -2.385312000 |
| 9 | -0.825230000 | -3.528616000 | -2.033748000 |
| 9 | 0.343188000  | -2.505244000 | -3.563218000 |
| 6 | -2.222976000 | -1.567194000 | 2.753414000  |
| 9 | -1.681485000 | -2.789605000 | 2.607070000  |
| 9 | -1.754247000 | -1.036936000 | 3.901096000  |
| 9 | -3.555914000 | -1.718601000 | 2.885701000  |
| 6 | -3.722443000 | 1.429218000  | -1.048617000 |
| 9 | -3.630171000 | 1.138872000  | -2.357344000 |
| 9 | -4.930685000 | 1.013034000  | -0.616799000 |
| 9 | -3.676984000 | 2.768811000  | -0.912255000 |
| 7 | 0.415530000  | 2.027006000  | 1.060734000  |
| 7 | 1.129961000  | 1.540200000  | -1.298661000 |
| 6 | 1.407929000  | 2.786151000  | -0.906132000 |
| 6 | 1.996423000  | 3.820221000  | -1.679066000 |
| 6 | 2.296640000  | 5.023776000  | -1.079894000 |
| 6 | 2.019928000  | 5.250012000  | 0.296899000  |
| 6 | 1.422424000  | 4.281079000  | 1.072698000  |
| 6 | 1.070381000  | 3.038631000  | 0.484881000  |
| 1 | 2.222671000  | 3.642195000  | -2.726421000 |
| 1 | 0.256966000  | 2.051551000  | 2.063749000  |
| 1 | 2.759552000  | 5.813724000  | -1.663090000 |
| 1 | 2.279114000  | 6.207406000  | 0.738087000  |
| 1 | 1.196576000  | 4.460155000  | 2.119959000  |
| 1 | 1.202544000  | 1.307836000  | -2.284828000 |

## 29

E=-3605.24947 a.u.

|    |              |              |              |
|----|--------------|--------------|--------------|
| 27 | 0.303228000  | 0.649308000  | -0.016544000 |
| 7  | 0.557962000  | 2.113784000  | 1.154486000  |
| 7  | 1.202178000  | 1.807351000  | -1.213478000 |
| 8  | 2.108083000  | -0.314781000 | 0.687482000  |
| 8  | 0.124970000  | -0.756088000 | -1.338001000 |
| 8  | -0.600177000 | -0.410932000 | 1.330319000  |
| 8  | -1.631191000 | 1.314515000  | -0.717531000 |
| 6  | 1.545054000  | 2.984055000  | -0.749895000 |
| 6  | 2.200300000  | 4.054509000  | -1.444719000 |
| 6  | 2.498110000  | 5.194797000  | -0.761232000 |
| 6  | 2.169700000  | 5.352894000  | 0.635792000  |
| 6  | 1.537394000  | 4.373242000  | 1.340495000  |
| 6  | 1.187985000  | 3.155002000  | 0.668468000  |
| 6  | 2.461552000  | -1.451417000 | 0.323070000  |
| 6  | 1.876283000  | -2.263663000 | -0.671658000 |

|   |              |              |              |
|---|--------------|--------------|--------------|
| 6 | 0.784057000  | -1.836361000 | -1.418337000 |
| 6 | -1.842593000 | -0.639979000 | 1.436431000  |
| 6 | -2.903437000 | -0.126436000 | 0.698270000  |
| 6 | -2.706723000 | 0.825183000  | -0.324873000 |
| 1 | 2.452233000  | 3.936208000  | -2.494200000 |
| 1 | 0.300512000  | 2.134445000  | 2.140788000  |
| 1 | 2.299395000  | -3.235814000 | -0.875582000 |
| 1 | -3.905819000 | -0.454150000 | 0.929045000  |
| 1 | 2.998532000  | 6.013212000  | -1.269355000 |
| 1 | 2.436735000  | 6.283699000  | 1.126418000  |
| 1 | 1.287562000  | 4.496096000  | 2.389963000  |
| 6 | 3.734542000  | -1.980319000 | 1.033728000  |
| 9 | 4.820082000  | -1.302727000 | 0.589088000  |
| 9 | 3.655600000  | -1.800061000 | 2.362398000  |
| 9 | 3.959518000  | -3.293157000 | 0.808987000  |
| 6 | 0.257880000  | -2.749859000 | -2.546542000 |
| 9 | 0.907606000  | -3.930694000 | -2.613986000 |
| 9 | -1.051064000 | -3.013137000 | -2.376076000 |
| 9 | 0.403249000  | -2.139152000 | -3.744103000 |
| 6 | -3.955766000 | 1.378562000  | -1.058618000 |
| 9 | -3.859019000 | 1.167886000  | -2.384389000 |
| 9 | -5.111521000 | 0.818993000  | -0.638536000 |
| 9 | -4.056446000 | 2.711696000  | -0.859191000 |
| 6 | -2.151366000 | -1.621073000 | 2.588213000  |
| 9 | -1.477117000 | -2.774660000 | 2.426139000  |
| 9 | -1.771733000 | -1.083952000 | 3.769699000  |
| 9 | -3.462873000 | -1.923409000 | 2.685040000  |
| 1 | 1.385826000  | 1.614229000  | -2.197577000 |

### 30

E=-3605.24546 a.u.

|    |              |              |              |
|----|--------------|--------------|--------------|
| 27 | 0.058876000  | 0.691083000  | -0.002209000 |
| 7  | -0.016404000 | 2.221487000  | 1.233925000  |
| 7  | 0.437285000  | 2.168063000  | -1.248224000 |
| 8  | 2.089779000  | 0.358459000  | 0.532553000  |
| 8  | 0.280692000  | -0.731332000 | -1.376772000 |
| 8  | -0.432838000 | -0.642978000 | 1.387721000  |
| 8  | -1.995949000 | 0.733530000  | -0.556513000 |
| 6  | 0.455182000  | 3.368336000  | -0.742152000 |
| 6  | 0.671741000  | 4.610381000  | -1.437889000 |
| 6  | 0.711664000  | 5.769594000  | -0.729815000 |
| 6  | 0.532622000  | 5.791762000  | 0.705331000  |
| 6  | 0.308155000  | 4.656180000  | 1.417584000  |
| 6  | 0.234464000  | 3.394971000  | 0.725605000  |
| 6  | 2.773811000  | -0.617412000 | 0.158046000  |
| 6  | 2.435031000  | -1.603578000 | -0.787187000 |

|   |              |              |              |
|---|--------------|--------------|--------------|
| 6 | 1.229078000  | -1.558846000 | -1.485201000 |
| 6 | -1.528419000 | -1.259588000 | 1.517660000  |
| 6 | -2.722134000 | -1.079890000 | 0.819987000  |
| 6 | -2.858004000 | -0.078793000 | -0.160854000 |
| 1 | 0.812561000  | 4.595126000  | -2.514327000 |
| 1 | -0.137430000 | 2.180273000  | 2.245846000  |
| 1 | 3.138537000  | -2.393385000 | -1.003339000 |
| 1 | -3.568982000 | -1.706215000 | 1.055657000  |
| 1 | 0.887395000  | 6.710960000  | -1.241911000 |
| 1 | 0.578797000  | 6.749069000  | 1.215491000  |
| 1 | 0.172022000  | 4.677788000  | 2.494375000  |
| 6 | 4.181581000  | -0.678887000 | 0.802358000  |
| 9 | 4.949323000  | 0.328727000  | 0.323745000  |
| 9 | 4.106252000  | -0.536710000 | 2.136618000  |
| 9 | 4.830014000  | -1.835566000 | 0.548144000  |
| 6 | 0.972423000  | -2.618831000 | -2.579471000 |
| 9 | 1.950665000  | -3.546127000 | -2.655361000 |
| 9 | -0.186565000 | -3.266761000 | -2.355555000 |
| 9 | 0.884376000  | -2.024006000 | -3.790614000 |
| 6 | -4.241937000 | 0.099111000  | -0.836411000 |
| 9 | -4.130535000 | 0.029360000  | -2.175444000 |
| 9 | -5.144021000 | -0.829553000 | -0.451715000 |
| 9 | -4.755306000 | 1.312144000  | -0.529010000 |
| 6 | -1.476864000 | -2.329700000 | 2.631079000  |
| 9 | -0.511145000 | -3.233746000 | 2.374495000  |
| 9 | -1.196316000 | -1.753525000 | 3.820515000  |
| 9 | -2.638406000 | -3.003058000 | 2.771897000  |
| 1 | 0.552425000  | 2.099383000  | -2.259415000 |

### 32

E=-3959.35280 a.u.

|    |              |              |              |
|----|--------------|--------------|--------------|
| 27 | 0.601813000  | 0.053855000  | -0.161841000 |
| 8  | -1.125763000 | -0.441550000 | 1.006394000  |
| 8  | -1.058045000 | 0.550962000  | -1.403116000 |
| 8  | 0.545728000  | 1.877996000  | 0.757465000  |
| 8  | 2.038610000  | 0.803573000  | -1.393591000 |
| 8  | 1.944044000  | -0.696948000 | 1.176536000  |
| 8  | 0.608021000  | -1.781775000 | -1.064083000 |
| 6  | -2.183496000 | 0.366874000  | -0.925475000 |
| 6  | -3.413180000 | 0.666999000  | -1.601672000 |
| 6  | -4.596977000 | 0.407935000  | -0.982888000 |
| 6  | -4.609366000 | -0.171317000 | 0.371454000  |
| 6  | -3.521070000 | -0.499851000 | 1.118370000  |
| 6  | -2.225180000 | -0.231197000 | 0.489629000  |
| 6  | 1.378182000  | 2.810334000  | 0.613747000  |
| 6  | 2.437007000  | 2.891110000  | -0.297858000 |

|   |              |              |              |
|---|--------------|--------------|--------------|
| 6 | 2.664967000  | 1.882527000  | -1.244987000 |
| 6 | 2.585681000  | -1.772850000 | 1.074306000  |
| 6 | 2.430664000  | -2.783038000 | 0.115162000  |
| 6 | 1.433453000  | -2.709342000 | -0.864988000 |
| 1 | -3.340591000 | 1.086918000  | -2.597000000 |
| 1 | 3.067096000  | 3.767758000  | -0.299315000 |
| 1 | 3.063515000  | -3.656457000 | 0.161291000  |
| 1 | -5.588866000 | -0.344845000 | 0.798803000  |
| 6 | 1.125782000  | 4.007247000  | 1.559034000  |
| 9 | -0.070479000 | 4.575691000  | 1.279632000  |
| 9 | 1.095150000  | 3.604017000  | 2.842918000  |
| 9 | 2.064596000  | 4.971819000  | 1.455299000  |
| 6 | 3.801050000  | 2.082805000  | -2.275590000 |
| 9 | 4.482882000  | 3.234963000  | -2.089305000 |
| 9 | 4.686926000  | 1.070316000  | -2.203050000 |
| 9 | 3.300640000  | 2.105859000  | -3.527568000 |
| 6 | 1.251097000  | -3.909145000 | -1.823041000 |
| 9 | 1.329022000  | -3.511928000 | -3.106117000 |
| 9 | 2.172339000  | -4.879045000 | -1.637645000 |
| 9 | 0.032725000  | -4.469175000 | -1.639565000 |
| 6 | 3.643911000  | -1.967495000 | 2.185441000  |
| 9 | 4.524602000  | -0.948410000 | 2.182926000  |
| 9 | 3.050840000  | -1.998341000 | 3.397280000  |
| 9 | 4.346005000  | -3.114106000 | 2.048394000  |
| 6 | -3.588240000 | -1.100950000 | 2.526270000  |
| 6 | -2.892732000 | -0.146174000 | 3.530070000  |
| 6 | -2.877770000 | -2.478458000 | 2.533659000  |
| 1 | -3.350566000 | -3.169326000 | 1.826833000  |
| 1 | -1.820179000 | -2.390250000 | 2.280147000  |
| 1 | -2.950501000 | -2.918934000 | 3.533801000  |
| 1 | -1.837316000 | -0.002771000 | 3.292887000  |
| 1 | -2.959878000 | -0.569163000 | 4.538136000  |
| 1 | -3.382503000 | 0.833728000  | 3.543965000  |
| 6 | -5.043687000 | -1.306398000 | 2.982327000  |
| 1 | -5.588052000 | -1.997155000 | 2.328340000  |
| 1 | -5.044817000 | -1.739861000 | 3.986866000  |
| 1 | -5.597432000 | -0.362141000 | 3.033995000  |
| 6 | -5.951572000 | 0.689170000  | -1.633871000 |
| 6 | -6.746409000 | -0.637093000 | -1.740809000 |
| 6 | -5.807455000 | 1.285061000  | -3.045220000 |
| 1 | -5.275225000 | 2.241791000  | -3.033401000 |
| 1 | -5.283482000 | 0.604967000  | -3.724678000 |
| 1 | -6.801257000 | 1.467968000  | -3.464975000 |
| 1 | -6.214734000 | -1.364421000 | -2.362766000 |
| 1 | -7.719132000 | -0.441402000 | -2.203870000 |
| 1 | -6.933712000 | -1.096419000 | -0.765685000 |

|   |              |             |              |
|---|--------------|-------------|--------------|
| 6 | -6.733261000 | 1.698496000 | -0.753766000 |
| 1 | -6.191295000 | 2.645784000 | -0.667627000 |
| 1 | -7.705648000 | 1.904226000 | -1.213482000 |
| 1 | -6.920771000 | 1.321418000 | 0.255998000  |

### 33

E=-3959.35675 a.u.

|    |              |              |              |
|----|--------------|--------------|--------------|
| 27 | 0.598991000  | 0.081482000  | -0.121676000 |
| 8  | 0.519976000  | 1.629093000  | 0.984286000  |
| 8  | 1.979445000  | 0.761287000  | -1.251637000 |
| 8  | 1.936209000  | -0.606087000 | 1.059859000  |
| 8  | 0.556749000  | -1.467749000 | -1.229212000 |
| 6  | 1.231464000  | 2.655522000  | 0.808397000  |
| 6  | 2.199183000  | 2.882555000  | -0.172195000 |
| 6  | 2.492909000  | 1.906261000  | -1.126186000 |
| 6  | 2.468406000  | -1.743067000 | 0.937660000  |
| 6  | 2.220336000  | -2.710057000 | -0.038294000 |
| 6  | 1.277498000  | -2.485511000 | -1.044117000 |
| 1  | 2.729572000  | 3.822287000  | -0.190156000 |
| 1  | 2.763093000  | -3.642624000 | -0.015371000 |
| 6  | 0.934244000  | 3.762994000  | 1.843444000  |
| 9  | 1.693588000  | 4.860404000  | 1.648775000  |
| 9  | -0.356915000 | 4.137426000  | 1.764221000  |
| 9  | 1.165264000  | 3.317105000  | 3.090051000  |
| 6  | 3.570165000  | 2.195488000  | -2.194529000 |
| 9  | 4.153377000  | 3.398848000  | -2.018469000 |
| 9  | 4.535444000  | 1.259373000  | -2.149693000 |
| 9  | 3.025088000  | 2.177613000  | -3.423747000 |
| 6  | 3.509731000  | -2.034527000 | 2.040273000  |
| 9  | 4.469420000  | -1.091841000 | 2.038103000  |
| 9  | 2.920929000  | -2.030921000 | 3.250048000  |
| 9  | 4.106738000  | -3.232525000 | 1.875462000  |
| 6  | 1.024409000  | -3.587174000 | -2.097364000 |
| 9  | 1.279925000  | -3.125758000 | -3.332856000 |
| 9  | 1.796057000  | -4.674460000 | -1.893028000 |
| 9  | -0.262262000 | -3.982874000 | -2.054346000 |
| 8  | -0.800579000 | -0.660738000 | 0.908142000  |
| 8  | -0.755295000 | 0.830508000  | -1.197757000 |
| 6  | -1.933058000 | 0.509137000  | -0.752872000 |
| 6  | -3.128225000 | 0.936658000  | -1.367652000 |
| 6  | -4.336995000 | 0.550660000  | -0.828091000 |
| 6  | -4.341492000 | -0.275195000 | 0.351083000  |
| 6  | -3.214753000 | -0.726938000 | 1.007124000  |
| 6  | -1.963814000 | -0.326501000 | 0.434931000  |
| 1  | -3.047252000 | 1.557509000  | -2.250883000 |
| 1  | -5.307678000 | -0.557396000 | 0.748616000  |

|   |              |              |              |
|---|--------------|--------------|--------------|
| 6 | -3.262981000 | -1.593158000 | 2.274275000  |
| 6 | -2.568567000 | -0.843038000 | 3.438059000  |
| 6 | -2.542513000 | -2.939435000 | 2.016368000  |
| 1 | -3.018051000 | -3.486484000 | 1.194695000  |
| 1 | -1.490041000 | -2.789696000 | 1.768804000  |
| 1 | -2.596194000 | -3.565015000 | 2.914464000  |
| 1 | -1.521161000 | -0.632212000 | 3.214171000  |
| 1 | -2.608173000 | -1.453825000 | 4.347162000  |
| 1 | -3.074816000 | 0.105878000  | 3.647082000  |
| 6 | -4.710451000 | -1.901931000 | 2.699921000  |
| 1 | -5.254821000 | -2.464302000 | 1.932969000  |
| 1 | -4.694921000 | -2.515199000 | 3.606490000  |
| 1 | -5.275222000 | -0.991943000 | 2.931165000  |
| 6 | -5.683304000 | 0.967978000  | -1.433936000 |
| 6 | -6.500706000 | 1.752591000  | -0.378240000 |
| 6 | -6.466600000 | -0.299611000 | -1.855683000 |
| 1 | -5.912398000 | -0.870583000 | -2.607962000 |
| 1 | -6.666186000 | -0.962658000 | -1.008404000 |
| 1 | -7.431844000 | -0.013527000 | -2.288379000 |
| 1 | -6.714812000 | 1.152050000  | 0.510996000  |
| 1 | -7.459959000 | 2.063017000  | -0.807206000 |
| 1 | -5.964781000 | 2.651868000  | -0.056944000 |
| 6 | -5.510767000 | 1.864282000  | -2.673844000 |
| 1 | -4.965213000 | 1.353214000  | -3.474010000 |
| 1 | -6.495310000 | 2.135901000  | -3.068168000 |
| 1 | -4.983210000 | 2.793791000  | -2.435213000 |

### 34

E=-3939.48714 a.u.

|    |              |              |              |
|----|--------------|--------------|--------------|
| 27 | -0.550087000 | -0.036929000 | -0.248275000 |
| 7  | 1.079697000  | -0.386119000 | -1.487082000 |
| 8  | 1.164187000  | 0.237471000  | 1.022070000  |
| 8  | -0.539571000 | 1.916484000  | -0.926592000 |
| 8  | -1.912193000 | 0.592621000  | 1.152077000  |
| 8  | -1.995175000 | -0.641421000 | -1.568420000 |
| 8  | -0.642866000 | -1.940101000 | 0.551215000  |
| 6  | 2.266373000  | 0.062585000  | 0.488263000  |
| 6  | 3.550694000  | 0.169108000  | 1.184193000  |
| 6  | 4.661437000  | -0.021553000 | 0.419619000  |
| 6  | 4.687342000  | -0.328096000 | -1.015111000 |
| 6  | 3.514254000  | -0.455054000 | -1.686660000 |
| 6  | 2.266864000  | -0.283111000 | -0.988312000 |
| 6  | -1.330929000 | 2.837703000  | -0.600299000 |
| 6  | -2.322449000 | 2.818713000  | 0.387140000  |
| 6  | -2.517233000 | 1.691325000  | 1.198077000  |
| 6  | -2.742117000 | -1.647427000 | -1.448831000 |

|   |              |              |              |
|---|--------------|--------------|--------------|
| 6 | -2.639470000 | -2.695182000 | -0.526639000 |
| 6 | -1.572657000 | -2.765532000 | 0.381672000  |
| 1 | -2.924471000 | 3.699782000  | 0.550765000  |
| 1 | -3.366213000 | -3.493273000 | -0.551144000 |
| 1 | 5.627014000  | 0.056835000  | 0.903541000  |
| 1 | 3.475219000  | -0.688385000 | -2.744868000 |
| 6 | -1.113185000 | 4.143880000  | -1.398922000 |
| 9 | 0.124028000  | 4.636930000  | -1.158984000 |
| 9 | -1.210103000 | 3.915585000  | -2.723157000 |
| 9 | -2.000584000 | 5.112437000  | -1.085993000 |
| 6 | -3.579435000 | 1.765405000  | 2.320434000  |
| 9 | -4.253842000 | 2.936866000  | 2.331919000  |
| 9 | -4.484718000 | 0.777292000  | 2.180328000  |
| 9 | -2.996482000 | 1.622594000  | 3.529159000  |
| 6 | -1.447586000 | -4.025739000 | 1.270434000  |
| 9 | -1.319070000 | -3.689547000 | 2.566246000  |
| 9 | -2.507386000 | -4.856497000 | 1.165412000  |
| 9 | -0.346110000 | -4.730345000 | 0.917952000  |
| 6 | -3.868430000 | -1.705728000 | -2.506585000 |
| 9 | -4.581537000 | -0.564811000 | -2.507471000 |
| 9 | -3.337774000 | -1.860988000 | -3.741237000 |
| 9 | -4.730084000 | -2.726813000 | -2.306566000 |
| 6 | 3.587409000  | 0.475205000  | 2.686435000  |
| 6 | 2.822927000  | -0.631015000 | 3.457422000  |
| 6 | 2.930420000  | 1.852985000  | 2.954098000  |
| 1 | 3.457548000  | 2.650293000  | 2.418257000  |
| 1 | 1.881467000  | 1.865552000  | 2.654824000  |
| 1 | 2.980627000  | 2.077754000  | 4.024856000  |
| 1 | 1.772552000  | -0.678629000 | 3.166752000  |
| 1 | 2.870113000  | -0.423387000 | 4.531826000  |
| 1 | 3.276523000  | -1.613403000 | 3.285072000  |
| 6 | 6.056541000  | -0.494138000 | -1.679369000 |
| 6 | 6.855955000  | 0.824292000  | -1.526484000 |
| 6 | 5.939617000  | -0.819211000 | -3.178854000 |
| 1 | 5.406566000  | -1.759980000 | -3.352502000 |
| 1 | 5.430354000  | -0.022748000 | -3.731755000 |
| 1 | 6.940935000  | -0.925993000 | -3.607245000 |
| 1 | 6.337201000  | 1.656828000  | -2.012945000 |
| 1 | 7.838924000  | 0.714844000  | -1.997103000 |
| 1 | 7.021496000  | 1.094388000  | -0.479233000 |
| 6 | 5.031560000  | 0.520546000  | 3.218485000  |
| 1 | 5.625249000  | 1.307995000  | 2.740058000  |
| 1 | 5.009937000  | 0.736136000  | 4.290892000  |
| 1 | 5.550171000  | -0.436409000 | 3.089467000  |
| 6 | 6.822139000  | -1.650209000 | -0.987860000 |
| 1 | 6.991547000  | -1.463639000 | 0.076792000  |

|   |             |              |              |
|---|-------------|--------------|--------------|
| 1 | 6.277570000 | -2.595277000 | -1.083508000 |
| 1 | 7.802833000 | -1.774309000 | -1.459312000 |
| 1 | 1.048972000 | -0.598319000 | -2.485832000 |

### 35

E=-3939.48630 a.u.

|    |              |              |              |
|----|--------------|--------------|--------------|
| 27 | -0.582113000 | -0.095984000 | -0.206826000 |
| 8  | -0.500835000 | 1.513714000  | -1.227125000 |
| 8  | -1.891706000 | 0.591861000  | 1.035794000  |
| 8  | -2.001471000 | -0.671234000 | -1.367257000 |
| 8  | -0.597729000 | -1.694974000 | 0.843126000  |
| 6  | -1.150616000 | 2.560314000  | -0.952144000 |
| 6  | -2.048053000 | 2.780517000  | 0.092929000  |
| 6  | -2.348142000 | 1.764433000  | 1.005267000  |
| 6  | -2.644733000 | -1.747789000 | -1.215215000 |
| 6  | -2.454096000 | -2.736865000 | -0.250576000 |
| 6  | -1.432483000 | -2.625445000 | 0.699057000  |
| 1  | -2.524473000 | 3.743899000  | 0.191479000  |
| 1  | -3.094501000 | -3.605562000 | -0.243737000 |
| 6  | -0.869822000 | 3.702097000  | -1.953727000 |
| 9  | -1.511454000 | 4.841996000  | -1.625144000 |
| 9  | 0.447709000  | 3.971717000  | -2.001360000 |
| 9  | -1.268421000 | 3.347340000  | -3.189544000 |
| 6  | -3.350829000 | 2.051345000  | 2.144788000  |
| 9  | -3.910875000 | 3.274286000  | 2.039139000  |
| 9  | -4.342615000 | 1.142453000  | 2.137822000  |
| 9  | -2.730752000 | 1.985125000  | 3.337809000  |
| 6  | -3.755254000 | -1.931365000 | -2.271736000 |
| 9  | -4.627717000 | -0.909399000 | -2.219554000 |
| 9  | -3.218749000 | -1.961179000 | -3.507857000 |
| 9  | -4.446593000 | -3.075387000 | -2.096492000 |
| 6  | -1.226515000 | -3.771000000 | 1.715980000  |
| 9  | -1.242666000 | -3.299360000 | 2.971940000  |
| 9  | -2.180971000 | -4.719165000 | 1.615841000  |
| 9  | -0.034871000 | -4.365464000 | 1.504606000  |
| 7  | 0.790813000  | -0.800685000 | -1.289451000 |
| 8  | 0.836308000  | 0.525292000  | 0.872149000  |
| 6  | 2.012904000  | 0.187369000  | 0.414392000  |
| 6  | 3.242873000  | 0.499341000  | 1.066536000  |
| 6  | 4.395712000  | 0.102355000  | 0.409554000  |
| 6  | 4.433309000  | -0.585199000 | -0.849871000 |
| 6  | 3.241835000  | -0.897419000 | -1.463034000 |
| 6  | 2.019829000  | -0.537040000 | -0.839231000 |
| 1  | 5.345961000  | 0.327233000  | 0.877210000  |
| 1  | 3.202051000  | -1.424620000 | -2.409764000 |
| 6  | 5.799294000  | -0.948416000 | -1.451943000 |



|   |             |              |              |
|---|-------------|--------------|--------------|
| 6 | 6.621323000 | 0.343668000  | -1.677138000 |
| 6 | 5.665874000 | -1.674402000 | -2.802887000 |
| 1 | 5.120897000 | -2.619519000 | -2.705645000 |
| 1 | 5.156621000 | -1.056071000 | -3.549917000 |
| 1 | 6.661725000 | -1.908003000 | -3.193073000 |
| 1 | 6.107000000 | 1.018915000  | -2.369194000 |
| 1 | 7.599158000 | 0.096203000  | -2.105865000 |
| 1 | 6.796371000 | 0.888402000  | -0.744626000 |
| 6 | 3.256389000 | 1.231418000  | 2.418136000  |
| 6 | 2.486540000 | 0.391632000  | 3.467039000  |
| 6 | 2.588669000 | 2.620412000  | 2.267814000  |
| 1 | 3.122629000 | 3.232318000  | 1.532131000  |
| 1 | 1.547408000 | 2.531015000  | 1.953018000  |
| 1 | 2.612420000 | 3.148688000  | 3.227832000  |
| 1 | 1.448485000 | 0.230814000  | 3.170407000  |
| 1 | 2.491625000 | 0.909645000  | 4.432976000  |
| 1 | 2.961634000 | -0.585924000 | 3.605780000  |
| 6 | 4.688971000 | 1.447479000  | 2.939749000  |
| 1 | 5.285620000 | 2.069863000  | 2.263498000  |
| 1 | 4.645218000 | 1.962251000  | 3.904929000  |
| 1 | 5.216522000 | 0.500222000  | 3.097928000  |
| 6 | 6.558751000 | -1.879148000 | -0.475656000 |
| 1 | 6.727172000 | -1.405868000 | 0.496279000  |
| 1 | 6.001479000 | -2.806485000 | -0.305843000 |
| 1 | 7.538253000 | -2.141070000 | -0.891728000 |
| 1 | 0.676955000 | -1.213673000 | -2.210467000 |

### 36

E=-3919.61375 a.u.

|    |              |              |              |
|----|--------------|--------------|--------------|
| 27 | -0.517391000 | -0.003335000 | -0.180828000 |
| 7  | 1.098731000  | -0.138563000 | -1.485392000 |
| 7  | 1.156454000  | 0.111129000  | 1.061360000  |
| 8  | -0.631442000 | 2.012171000  | -0.715201000 |
| 8  | -1.891278000 | 0.468768000  | 1.296607000  |
| 8  | -1.981504000 | -0.465619000 | -1.563834000 |
| 8  | -0.628374000 | -2.011031000 | 0.386382000  |
| 6  | 2.328103000  | 0.016339000  | 0.525870000  |
| 6  | 3.637198000  | -0.013843000 | 1.195755000  |
| 6  | 4.727839000  | -0.030784000 | 0.382544000  |
| 6  | 4.712085000  | -0.036906000 | -1.080430000 |
| 6  | 3.518210000  | -0.051622000 | -1.724964000 |
| 6  | 2.286761000  | -0.062635000 | -0.977616000 |
| 6  | -1.484952000 | 2.848454000  | -0.333652000 |
| 6  | -2.467536000 | 2.698812000  | 0.655659000  |
| 6  | -2.571376000 | 1.519971000  | 1.404646000  |
| 6  | -2.708637000 | -1.489859000 | -1.590255000 |

|   |              |              |              |
|---|--------------|--------------|--------------|
| 6 | -2.593691000 | -2.652687000 | -0.817484000 |
| 6 | -1.540801000 | -2.820938000 | 0.092556000  |
| 1 | -3.130492000 | 3.523144000  | 0.871467000  |
| 1 | -3.304422000 | -3.453375000 | -0.957025000 |
| 1 | 5.706601000  | -0.038553000 | 0.842964000  |
| 1 | 3.445721000  | -0.070215000 | -2.806601000 |
| 6 | -1.367542000 | 4.216139000  | -1.048036000 |
| 9 | -0.169688000 | 4.783425000  | -0.772119000 |
| 9 | -1.448675000 | 4.067492000  | -2.384122000 |
| 9 | -2.323376000 | 5.095888000  | -0.676965000 |
| 6 | -3.616584000 | 1.461987000  | 2.543335000  |
| 9 | -4.364591000 | 2.583534000  | 2.636609000  |
| 9 | -4.458733000 | 0.426006000  | 2.364168000  |
| 9 | -3.000103000 | 1.289102000  | 3.734499000  |
| 6 | -1.411238000 | -4.182445000 | 0.816209000  |
| 9 | -1.289618000 | -4.011369000 | 2.146539000  |
| 9 | -2.463838000 | -5.001995000 | 0.604871000  |
| 9 | -0.302707000 | -4.831352000 | 0.385993000  |
| 6 | -3.828627000 | -1.423141000 | -2.655150000 |
| 9 | -4.562515000 | -0.304550000 | -2.506815000 |
| 9 | -3.289976000 | -1.400213000 | -3.895812000 |
| 9 | -4.674664000 | -2.475908000 | -2.603055000 |
| 6 | 3.757311000  | -0.014760000 | 2.731944000  |
| 6 | 3.046212000  | -1.259324000 | 3.325881000  |
| 6 | 3.172226000  | 1.294392000  | 3.325595000  |
| 1 | 3.703167000  | 2.167134000  | 2.931248000  |
| 1 | 2.109026000  | 1.442528000  | 3.121524000  |
| 1 | 3.294799000  | 1.288414000  | 4.413624000  |
| 1 | 1.978890000  | -1.315313000 | 3.099638000  |
| 1 | 3.149469000  | -1.254681000 | 4.416088000  |
| 1 | 3.503705000  | -2.179552000 | 2.948261000  |
| 6 | 6.059886000  | -0.034691000 | -1.809524000 |
| 6 | 6.849807000  | 1.236534000  | -1.409480000 |
| 6 | 5.891494000  | -0.040020000 | -3.338745000 |
| 1 | 5.362615000  | -0.933097000 | -3.687932000 |
| 1 | 5.351516000  | 0.844439000  | -3.692864000 |
| 1 | 6.876760000  | -0.035544000 | -3.815126000 |
| 1 | 6.304659000  | 2.143092000  | -1.692095000 |
| 1 | 7.816192000  | 1.246896000  | -1.924746000 |
| 1 | 7.049886000  | 1.283050000  | -0.334696000 |
| 6 | 5.230036000  | -0.085695000 | 3.184415000  |
| 1 | 5.807251000  | 0.783174000  | 2.850723000  |
| 1 | 5.266991000  | -0.100971000 | 4.277901000  |
| 1 | 5.726331000  | -0.994270000 | 2.827500000  |
| 6 | 6.862938000  | -1.295154000 | -1.402553000 |
| 1 | 7.060749000  | -1.336331000 | -0.327194000 |

|   |             |              |              |
|---|-------------|--------------|--------------|
| 1 | 6.328767000 | -2.208742000 | -1.683589000 |
| 1 | 7.830846000 | -1.296531000 | -1.915171000 |
| 1 | 1.071242000 | -0.156355000 | -2.505380000 |
| 1 | 1.135389000 | 0.130179000  | 2.077181000  |

### 37

E=-3919.60975 a.u.

|    |              |              |              |
|----|--------------|--------------|--------------|
| 27 | 0.583594000  | 0.053956000  | -0.137417000 |
| 8  | 0.562431000  | -1.608489000 | -1.087928000 |
| 8  | 1.924933000  | -0.543852000 | 1.140379000  |
| 8  | 1.990502000  | 0.598826000  | -1.363044000 |
| 8  | 0.592543000  | 1.715242000  | 0.817137000  |
| 6  | 1.313015000  | -2.585524000 | -0.826474000 |
| 6  | 2.266015000  | -2.708921000 | 0.188639000  |
| 6  | 2.486477000  | -1.671498000 | 1.097640000  |
| 6  | 2.581851000  | 1.710565000  | -1.309380000 |
| 6  | 2.361085000  | 2.761096000  | -0.415562000 |
| 6  | 1.378147000  | 2.669168000  | 0.573797000  |
| 1  | 2.834085000  | -3.622502000 | 0.275180000  |
| 1  | 2.956959000  | 3.657848000  | -0.490193000 |
| 6  | 1.082736000  | -3.777326000 | -1.782602000 |
| 9  | 1.933963000  | -4.796939000 | -1.545587000 |
| 9  | -0.171710000 | -4.250251000 | -1.640464000 |
| 9  | 1.242543000  | -3.396787000 | -3.061499000 |
| 6  | 3.520838000  | -1.872376000 | 2.226378000  |
| 9  | 4.162498000  | -3.055116000 | 2.134596000  |
| 9  | 4.447054000  | -0.897790000 | 2.198210000  |
| 9  | 2.908364000  | -1.831334000 | 3.427761000  |
| 6  | 3.664422000  | 1.869462000  | -2.398947000 |
| 9  | 4.582025000  | 0.890797000  | -2.297726000 |
| 9  | 3.105693000  | 1.792472000  | -3.623630000 |
| 9  | 4.310132000  | 3.050820000  | -2.316959000 |
| 6  | 1.155502000  | 3.871357000  | 1.518525000  |
| 9  | 1.228116000  | 3.484993000  | 2.803609000  |
| 9  | 2.066097000  | 4.848492000  | 1.328792000  |
| 9  | -0.065564000 | 4.404247000  | 1.310629000  |
| 7  | -0.808375000 | 0.667715000  | -1.256162000 |
| 7  | -0.862379000 | -0.508047000 | 0.944415000  |
| 6  | -2.086463000 | -0.196530000 | 0.497962000  |
| 6  | -3.356028000 | -0.391976000 | 1.144373000  |
| 6  | -4.476994000 | -0.099092000 | 0.390070000  |
| 6  | -4.458718000 | 0.384298000  | -0.958386000 |
| 6  | -3.239523000 | 0.617174000  | -1.556095000 |
| 6  | -2.045365000 | 0.380839000  | -0.834499000 |
| 1  | -5.448210000 | -0.250976000 | 0.841633000  |
| 1  | -3.160816000 | 1.003988000  | -2.565921000 |

|   |              |              |              |
|---|--------------|--------------|--------------|
| 6 | -5.796296000 | 0.628343000  | -1.673899000 |
| 6 | -6.592876000 | -0.697647000 | -1.739157000 |
| 6 | -5.602559000 | 1.141692000  | -3.112465000 |
| 1 | -5.073227000 | 2.100358000  | -3.136175000 |
| 1 | -5.049121000 | 0.426003000  | -3.729805000 |
| 1 | -6.579897000 | 1.295073000  | -3.581698000 |
| 1 | -6.036538000 | -1.460883000 | -2.293471000 |
| 1 | -7.550217000 | -0.536696000 | -2.247835000 |
| 1 | -6.809079000 | -1.096921000 | -0.743610000 |
| 6 | -3.462632000 | -0.920589000 | 2.588443000  |
| 6 | -2.736873000 | 0.038071000  | 3.566943000  |
| 6 | -2.873963000 | -2.351202000 | 2.685370000  |
| 1 | -3.431193000 | -3.038471000 | 2.040100000  |
| 1 | -1.823901000 | -2.410682000 | 2.388739000  |
| 1 | -2.949236000 | -2.717012000 | 3.715481000  |
| 1 | -1.674494000 | 0.171952000  | 3.347567000  |
| 1 | -2.815033000 | -0.344138000 | 4.590855000  |
| 1 | -3.196650000 | 1.031461000  | 3.540649000  |
| 6 | -4.927685000 | -1.009252000 | 3.063153000  |
| 1 | -5.514498000 | -1.709168000 | 2.459258000  |
| 1 | -4.948804000 | -1.370632000 | 4.096419000  |
| 1 | -5.423764000 | -0.033211000 | 3.045547000  |
| 6 | -6.616478000 | 1.683235000  | -0.892397000 |
| 1 | -6.835745000 | 1.360072000  | 0.129720000  |
| 1 | -6.076654000 | 2.634468000  | -0.835735000 |
| 1 | -7.573133000 | 1.863778000  | -1.395975000 |
| 1 | -0.677880000 | 0.913987000  | -2.233183000 |
| 1 | -0.736698000 | -0.768645000 | 1.914419000  |

### **3,5-di-(*tert*-butyl)-*o*-benzoquinone**

E=-695.68550 a.u.

|   |              |              |              |
|---|--------------|--------------|--------------|
| 8 | -2.316578000 | 1.934643000  | 0.000497000  |
| 8 | -0.037002000 | 3.434212000  | -0.000311000 |
| 6 | 0.059501000  | 2.221310000  | -0.000097000 |
| 6 | 1.342617000  | 1.524309000  | 0.000007000  |
| 6 | 1.405573000  | 0.172633000  | 0.000031000  |
| 6 | 0.162084000  | -0.619025000 | -0.000033000 |
| 6 | -1.100599000 | -0.127589000 | 0.000008000  |
| 6 | -1.248341000 | 1.356588000  | 0.000128000  |
| 1 | 2.222540000  | 2.157141000  | 0.000014000  |
| 1 | 0.290619000  | -1.694756000 | -0.000107000 |
| 6 | -2.354917000 | -1.010956000 | -0.000052000 |
| 6 | -3.197608000 | -0.717123000 | -1.266955000 |
| 6 | -3.197300000 | -0.717808000 | 1.267215000  |
| 1 | -2.619658000 | -0.921822000 | 2.175980000  |
| 1 | -3.533566000 | 0.319640000  | 1.293536000  |

|   |              |              |              |
|---|--------------|--------------|--------------|
| 1 | -4.080703000 | -1.366349000 | 1.278907000  |
| 1 | -3.533886000 | 0.320340000  | -1.292637000 |
| 1 | -4.081016000 | -1.365654000 | -1.278783000 |
| 1 | -2.620190000 | -0.920646000 | -2.175972000 |
| 6 | -2.000911000 | -2.509838000 | -0.000498000 |
| 1 | -1.430264000 | -2.800061000 | 0.889119000  |
| 1 | -2.925304000 | -3.096119000 | -0.000562000 |
| 1 | -1.430442000 | -2.799572000 | -0.890388000 |
| 6 | 2.726974000  | -0.603762000 | 0.000037000  |
| 6 | 3.950158000  | 0.330022000  | 0.000287000  |
| 6 | 2.794704000  | -1.493805000 | -1.266185000 |
| 1 | 1.977561000  | -2.219830000 | -1.311650000 |
| 1 | 2.756451000  | -0.884301000 | -2.175080000 |
| 1 | 3.735411000  | -2.055130000 | -1.272860000 |
| 1 | 3.973259000  | 0.970946000  | -0.887079000 |
| 1 | 4.866701000  | -0.268595000 | 0.000120000  |
| 1 | 3.973267000  | 0.970484000  | 0.887990000  |
| 6 | 2.794561000  | -1.494234000 | 1.265972000  |
| 1 | 1.977155000  | -2.219958000 | 1.311356000  |
| 1 | 3.735046000  | -2.055933000 | 1.272339000  |
| 1 | 2.756689000  | -0.885001000 | 2.175068000  |

### **3,5-di-(*tert*-butyl)-*o*-benzoquinone imine**

E=-675.80613 a.u.

|   |              |              |              |
|---|--------------|--------------|--------------|
| 7 | -0.109235000 | 3.472931000  | -0.036478000 |
| 8 | -2.336923000 | 1.912103000  | 0.052267000  |
| 6 | -1.253530000 | 1.358060000  | 0.017169000  |
| 6 | -1.097852000 | -0.126519000 | -0.001152000 |
| 6 | 0.161747000  | -0.628564000 | -0.005303000 |
| 6 | 1.401977000  | 0.156861000  | 0.000773000  |
| 6 | 1.320411000  | 1.505930000  | 0.000808000  |
| 6 | 0.035977000  | 2.197621000  | -0.006837000 |
| 1 | 0.282984000  | -1.705371000 | -0.012343000 |
| 1 | 2.207617000  | 2.132274000  | 0.000748000  |
| 6 | -2.354152000 | -1.009083000 | -0.006552000 |
| 6 | -3.207447000 | -0.694629000 | -1.261313000 |
| 6 | -3.186913000 | -0.742272000 | 1.272846000  |
| 1 | -2.601476000 | -0.965343000 | 2.172241000  |
| 1 | -3.520894000 | 0.294743000  | 1.322544000  |
| 1 | -4.070388000 | -1.391156000 | 1.278430000  |
| 1 | -3.542055000 | 0.343475000  | -1.267242000 |
| 1 | -4.091346000 | -1.342686000 | -1.276722000 |
| 1 | -2.636936000 | -0.884209000 | -2.177844000 |
| 6 | 2.729169000  | -0.611234000 | 0.003496000  |
| 6 | 2.799387000  | -1.505418000 | 1.265941000  |
| 6 | 3.946371000  | 0.330596000  | 0.012010000  |

|   |              |              |              |
|---|--------------|--------------|--------------|
| 1 | 3.970324000  | 0.973110000  | -0.874566000 |
| 1 | 3.961088000  | 0.968860000  | 0.901860000  |
| 1 | 4.867536000  | -0.261046000 | 0.015266000  |
| 1 | 2.755283000  | -0.899489000 | 2.177099000  |
| 1 | 3.741484000  | -2.064760000 | 1.274427000  |
| 1 | 1.983403000  | -2.233108000 | 1.305808000  |
| 6 | -2.002713000 | -2.508637000 | -0.037747000 |
| 1 | -1.427912000 | -2.817463000 | 0.842945000  |
| 1 | -2.928483000 | -3.092844000 | -0.043827000 |
| 1 | -1.437502000 | -2.782325000 | -0.936109000 |
| 6 | 2.810337000  | -1.497017000 | -1.264145000 |
| 1 | 1.994749000  | -2.224445000 | -1.316029000 |
| 1 | 2.774236000  | -0.885094000 | -2.171640000 |
| 1 | 3.752465000  | -2.056353000 | -1.268098000 |
| 1 | 0.809233000  | 3.931713000  | -0.049696000 |

### **3,5-di-(*tert*-butyl)-*o*-benzoquinone diimine**

E=-655.91799 a.u.

|   |              |              |              |
|---|--------------|--------------|--------------|
| 7 | -2.174540000 | 2.018564000  | 0.764472000  |
| 7 | -0.141689000 | 3.397462000  | -0.517049000 |
| 6 | 0.024439000  | 2.186727000  | -0.122260000 |
| 6 | 1.316204000  | 1.510640000  | -0.023207000 |
| 6 | 1.395228000  | 0.160826000  | 0.006625000  |
| 6 | 0.152069000  | -0.614752000 | -0.057293000 |
| 6 | -1.099802000 | -0.096769000 | 0.010407000  |
| 6 | -1.200513000 | 1.373897000  | 0.235903000  |
| 1 | 2.200606000  | 2.139668000  | -0.049470000 |
| 1 | -2.958854000 | 1.399215000  | 0.970764000  |
| 1 | 0.264151000  | -1.686656000 | -0.163646000 |
| 1 | 0.770046000  | 3.837224000  | -0.688638000 |
| 6 | -2.356595000 | -0.985881000 | -0.091078000 |
| 6 | -2.008462000 | -2.393795000 | -0.619134000 |
| 6 | -3.369600000 | -0.370382000 | -1.089069000 |
| 1 | -3.713617000 | 0.624257000  | -0.798311000 |
| 1 | -2.922970000 | -0.284257000 | -2.085482000 |
| 1 | -4.249287000 | -1.018381000 | -1.169672000 |
| 1 | -1.498172000 | -2.349525000 | -1.586898000 |
| 1 | -2.932438000 | -2.965531000 | -0.753697000 |
| 1 | -1.380835000 | -2.956621000 | 0.079594000  |
| 6 | -3.016168000 | -1.182590000 | 1.300185000  |
| 1 | -3.388504000 | -0.255881000 | 1.744617000  |
| 1 | -3.868808000 | -1.865573000 | 1.211104000  |
| 1 | -2.302789000 | -1.621000000 | 2.005837000  |
| 6 | 2.719571000  | -0.611608000 | 0.051681000  |
| 6 | 3.936030000  | 0.326670000  | 0.141578000  |
| 6 | 2.863984000  | -1.471405000 | -1.227732000 |

|   |             |              |              |
|---|-------------|--------------|--------------|
| 1 | 2.053644000 | -2.199150000 | -1.333627000 |
| 1 | 2.869685000 | -0.841311000 | -2.123445000 |
| 1 | 3.806569000 | -2.029555000 | -1.198300000 |
| 1 | 4.014772000 | 0.976630000  | -0.736276000 |
| 1 | 4.854682000 | -0.266791000 | 0.194996000  |
| 1 | 3.896470000 | 0.957969000  | 1.035591000  |
| 6 | 2.725702000 | -1.532844000 | 1.296236000  |
| 1 | 1.904498000 | -2.255741000 | 1.279491000  |
| 1 | 3.663777000 | -2.097648000 | 1.339712000  |
| 1 | 2.638452000 | -0.945938000 | 2.216741000  |

**Table S1.** Total and relative energies of the low- and high-spin electromeric forms of adducts of Co(acac)<sub>2</sub> and Co(hfacac)<sub>2</sub> with o-benzoquinone.

| Functional | Structure | S   | E, a.u.      | $\Delta E$ ,<br>kcal•mol <sup>-1</sup> |
|------------|-----------|-----|--------------|----------------------------------------|
| B3LYP*     | <b>9</b>  | 3/2 | -2454.223550 | 15.5                                   |
|            | <b>10</b> | 1/2 | -2454.248260 | 0.0                                    |
|            | <b>11</b> | 3/2 | -3644.982700 | 6.8                                    |
|            | <b>12</b> | 1/2 | -3644.993590 | 0.0                                    |
| B3LYP      | <b>9</b>  | 3/2 | -2455.039992 | 12.1                                   |
|            | <b>10</b> | 1/2 | -2455.059262 | 0.0                                    |
|            | <b>11</b> | 3/2 | -3646.292543 | 0.7                                    |
|            | <b>12</b> | 1/2 | -3646.293601 | 0.0                                    |
| B3P86      | <b>9</b>  | 3/2 | -2458.502297 | 15.8                                   |
|            | <b>10</b> | 1/2 | -2458.527408 | 0.0                                    |
|            | <b>11</b> | 3/2 | -3651.390401 | 6.2                                    |
|            | <b>12</b> | 1/2 | -3651.400311 | 0.0                                    |
| BLYP       | <b>9</b>  | 3/2 | -2454.769850 | 20.4                                   |
|            | <b>10</b> | 1/2 | -2454.802413 | 0.0                                    |
|            | <b>11</b> | 3/2 | -3646.042097 | 14.2                                   |
|            | <b>12</b> | 1/2 | -3646.064747 | 0.0                                    |
| OPBE       | <b>9</b>  | 3/2 | -2454.789177 | 11.5                                   |
|            | <b>10</b> | 1/2 | -2454.807554 | 0.0                                    |
|            | <b>11</b> | 3/2 | -3645.413810 | 6.7                                    |
|            | <b>12</b> | 1/2 | -3645.424460 | 0.0                                    |



**Figure S1.** Electromeric forms of adduct **3** (the calculations have been carried out for model compounds stripped of two the bulky *tert*-butyl groups in positions 4,4'). The hydrogen atoms are omitted.

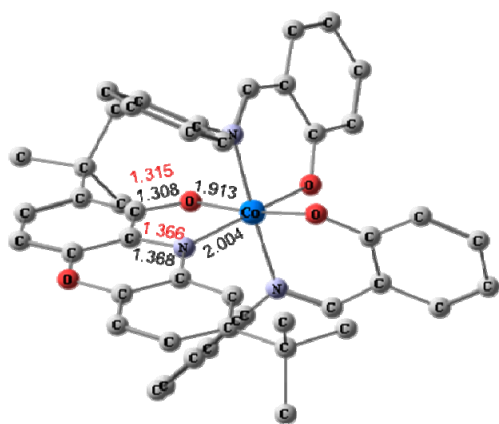

**S1**,  $_{LS}Co^{III}$

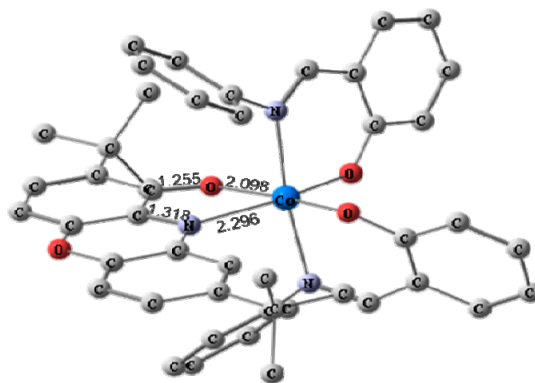

**S2**,  $_{HS}Co^{II}$

$\Delta E = 11.1$  kcal/mol,  $E_{stab} = 0.8$  kcal/mol
